# Supplementary material
Source: publisher figshare collection journal article supplement (https://future-science-group.figshare.com/articles/dataset/_/22275001)
Supplement: Supplementary file 1 [file 1]

## Sheet: Sub_Tab_2
Supplementary Table 2. CpGs significantly (>= 0.2) correlated with the first two axes (PC1 and PC2) of the PCA based on the methylation values of variable autosomal probes (N = 39,239) for the complete dataset without outliers (N = 52). The last column points to reviews or articles about the genes associated with the PC2 and therefore partially co-varying with the risperidone response, linking th…
CpG	Correlation with PC1	P-value PC1	Correlation with PC2	P-value PC2	CpG annotation	Previous findings
cg00810292	-0.84573	0			TBC1D4
cg15991124	-0.83217	0			GARRE1
cg17765669	-0.81763	0	0.345	0.012233
cg10149070	-0.81396	0
cg25170017	-0.80886	0			EHD1
cg26033526	-0.80657	0	0.438	0.001159	TAP1
cg25424475	-0.7946	0	0.395	0.003727	C12orf42
cg26348243	-0.79424	0	0.309	0.025866	LTA
cg09993145	-0.78372	0			RUNX3
cg06958535	-0.78019	0			LAX1
cg20567337	-0.77851	0
cg20633213	-0.76729	0	0.294	0.034266	PRTFDC1
cg00446123	-0.76441	0			LIME1
cg08169020	-0.75837	0	0.286	0.039802	ZFP36L1
cg13429095	-0.75799	0	0.277	0.046635
cg17633917	-0.72563	0	0.349	0.011312
cg12894371	-0.72196	0
cg20904244	-0.71652	0			MIR548AN
cg02406032	-0.7125	0	0.28	0.04468	NFATC1
cg04347414	-0.71082	0			PRKCZ
cg16278496	-0.70972	0			LINC01550
cg06138905	-0.70463	0			FNDC3B
cg05799811	-0.70337	0			CD247
cg21221767	-0.70015	0
cg22803353	-0.69937	0	0.426	0.001653
cg26072483	-0.69503	0
cg11654325	-0.6933	0	0.331	0.016533	RTP5
cg26021007	-0.69279	0
cg17754737	-0.69061	0			ZNRF2
cg04425687	-0.68542	0	0.455	0.000692	TLE1
cg14116050	-0.68509	0
cg23428870	-0.68418	0			BTG1
cg13185883	-0.68322	0			TAB2
cg10250177	-0.67818	0			LCK
cg16038030	-0.6759	0	0.347	0.011616
cg18275512	-0.67565	0			ATP2B2
cg22763697	-0.67496	0			ST18
cg01662310	-0.67229	0
cg07706695	-0.67138	0
cg12957036	-0.67137	0
cg03364760	-0.66404	0
cg09753321	-0.66368	0
cg16405455	-0.66144	0			IKZF3
cg00738635	-0.65907	0	0.342	0.01312
cg12472786	-0.65894	0	0.351	0.010829
cg06370827	-0.65376	0			ARHGAP10
cg11630392	-0.65345	0			GPR171
cg04301661	-0.6531	0			VPS13D
cg13129556	-0.65285	0	-0.306	0.02739	SLC9A8
cg02864956	-0.65099	0			PIP4K2A
cg25529535	-0.64966	0
cg18758626	-0.64882	0
cg01551540	-0.6485	0	0.364	0.007931	OGDHL
cg17286920	-0.64671	0			ZNF423
cg02737268	-0.64458	0			CDC25B
cg26474010	-0.6408	0	0.382	0.005238	ZCCHC14
cg06975684	-0.63936	0	0.284	0.04164	CCDC148
cg21264165	-0.63912	0			PTPRO
cg15887809	-0.63787	0			ARID1B
cg19661705	-0.63542	0			TRPM1
cg22439390	-0.63449	0
cg13460319	-0.63445	0	0.432	0.001394	GLCE
cg22791839	-0.63381	0			PPP2R5C
cg08569786	-0.63374	0			KLHL29
cg19853386	-0.63363	0			COTL1
cg08154101	-0.63312	0			NTN1
cg21429687	-0.63196	0	0.288	0.038641	ANK3
cg24360658	-0.6309	0			BTG1
cg19638572	-0.63052	0	0.366	0.007679	RASSF5
cg19894966	-0.62808	0			AFG1L
cg05473085	-0.62798	0			CACNA1E
cg09744194	-0.62732	0
cg06657721	-0.62661	0
cg13286857	-0.62577	0			MAST4
cg04543901	-0.62513	0
cg13424484	-0.62512	0			ARID5B
cg11579116	-0.62349	0	0.461	0.000585	ADGRE4P
cg15625636	-0.6208	0			GPR65
cg12166603	-0.61594	0
cg17442683	-0.61438	0			RERE
cg04858631	-0.61369	0			DDIT4
cg10685628	-0.61277	0
cg26329274	-0.60984	0	0.358	0.009175	ITK
cg25276383	-0.60819	0	0.363	0.008204
cg19495351	-0.60684	0			UNC80
cg01509920	-0.60676	0			RAP1B
cg04085571	-0.60534	0			LSP1
cg08247403	-0.60374	0	0.297	0.032628
cg00618078	-0.60206	0			LOC283440
cg07631435	-0.60192	0			ZBTB16
cg00649318	-0.60187	0	0.323	0.019626	DAB2IP
cg14467744	-0.6002	0
cg24699005	-0.59902	0
cg12048965	-0.59865	0
cg10863922	-0.59824	0			SERPINB9
cg14079719	-0.59626	0	0.282	0.043054	IPCEF1
cg17109893	-0.59617	0	0.504	0.000141
cg05618183	-0.59563	0	0.453	0.000737	FUS
cg25920590	-0.59506	0	0.483	0.000285
cg09459403	-0.59479	0	0.412	0.002399	ITPR1
cg02903275	-0.59463	0	0.425	0.00167
cg09520904	-0.59306	0			CCND1
cg20995778	-0.59153	0			NLRP2
cg04770397	-0.5911	0			TMEM132B
cg24693760	-0.5908	0
cg02757819	-0.59057	0	0.432	0.001366
cg00160670	-0.58859	0	0.31	0.025447	LINC00649
cg07010297	-0.58826	0
cg18154283	-0.58764	0
cg05610000	-0.58633	0			MACROD2
cg09831549	-0.5863	0	-0.289	0.037503
cg26440042	-0.58516	1e-05
cg21201401	-0.58509	1e-05			LIME1
cg20687262	-0.58437	1e-05			SFMBT2
cg13794507	-0.58424	1e-05	0.443	0.001009
cg19651767	-0.584	1e-05
cg16940601	-0.58385	1e-05			INSR
cg16062483	-0.58287	1e-05			LINC01550
cg04293724	-0.58232	1e-05			SIAH2
cg22396227	-0.58167	1e-05			CPE
cg27275193	-0.57921	1e-05			CDNF
cg06977072	-0.57909	1e-05	0.528	5.7e-05	FAXC
cg08007485	-0.57894	1e-05	0.535	4.3e-05
cg15509704	-0.57788	1e-05	0.303	0.028769	CTNNBL1
cg15068593	-0.57785	1e-05			ELK3
cg04749561	-0.57763	1e-05	0.286	0.039576	WT1
cg05008639	-0.57613	1e-05
cg07002468	-0.57545	1e-05
cg16043641	-0.57336	1e-05			CACNA1B
cg09805466	-0.57318	1e-05	0.343	0.012746	MOGAT1
cg15360181	-0.57243	1e-05			SLC9A9
cg06248041	-0.57219	1e-05	-0.468	0.000471	IL23R
cg07646083	-0.57186	1e-05			SPRED2
cg24562785	-0.57161	1e-05			SIRPG
cg02780914	-0.57131	1e-05			WDR7
cg16266379	-0.57112	1e-05	0.39	0.004301
cg14670922	-0.57051	1e-05			PIK3R5
cg00284949	-0.56936	1e-05	0.339	0.013829	ST6GAL1
cg17546903	-0.5691	1e-05			SPATA13
cg04923139	-0.56909	1e-05			SLC13A5
cg05722568	-0.56838	1e-05			SOX6
cg04495317	-0.56613	1e-05	0.394	0.003893	FAM167A
cg27128549	-0.56612	1e-05			PRKCE
cg18054755	-0.56565	1e-05
cg18547326	-0.56503	1e-05
cg07327489	-0.56433	1e-05	0.296	0.033277	RAPGEF1
cg11753157	-0.56302	1e-05	0.344	0.012508	BCL11B
cg18311704	-0.56299	1e-05
cg08035822	-0.56221	1e-05			OASL
cg11099984	-0.55992	2e-05			BCL2
cg17499833	-0.55854	2e-05	0.512	0.000104
cg27140006	-0.55824	2e-05	0.309	0.025943
cg07531663	-0.55749	2e-05			LINC00293
cg24190088	-0.55748	2e-05			FCAMR
cg27102141	-0.55745	2e-05
cg16047279	-0.55721	2e-05	0.318	0.021585	CCR7
cg16948489	-0.55674	2e-05			LAX1
cg00043591	-0.55646	2e-05	0.298	0.031933
cg05477778	-0.55644	2e-05	0.341	0.013416	EPS15L1
cg13020838	-0.55603	2e-05	0.4	0.003264
cg04987431	-0.55573	2e-05			ARGLU1
cg12147622	-0.5555	2e-05	0.294	0.034178
cg24749265	-0.55515	2e-05	0.483	0.000285	TREML5P
cg07248223	-0.55454	2e-05	0.35	0.010878	CCR7
cg05704952	-0.55414	2e-05
cg19869818	-0.55395	2e-05
cg21052932	-0.55381	2e-05	0.49	0.000229	ABHD12B
cg06336817	-0.55306	2e-05	0.284	0.041356	HSPA8
cg25154055	-0.55278	2e-05	0.327	0.01788	SMG6
cg08722407	-0.5527	2e-05
cg10160527	-0.55236	2e-05	0.409	0.00258
cg19921651	-0.55137	2e-05
cg21063056	-0.55108	2e-05	0.381	0.005386
cg10835083	-0.55094	2e-05	-0.358	0.009078	EPHA4
cg18846770	-0.55074	2e-05	0.287	0.039132
cg24422984	-0.54985	2e-05			STK4
cg11931463	-0.54963	2e-05
cg18140886	-0.54906	2e-05
cg19159011	-0.54851	3e-05			IKZF1
cg03441853	-0.54819	3e-05	0.507	0.000126	ADPGK
cg07688618	-0.54656	3e-05	0.295	0.033832	SLC7A6
cg16912386	-0.54591	3e-05	0.529	5.6e-05	STX8
cg15850249	-0.54421	3e-05			LINC02693
cg06382930	-0.54395	3e-05	0.402	0.003125	DPF2
cg15294621	-0.54386	3e-05
cg23119049	-0.54354	3e-05			CDH23
cg17711527	-0.54354	3e-05			LAX1
cg25970726	-0.54339	3e-05	0.415	0.002225	HPSE2
cg07033604	-0.54216	3e-05
cg07233246	-0.54206	3e-05			PHACTR3
cg10154826	-0.54165	3e-05			FAM8A1
cg21379388	-0.54141	3e-05
cg04661335	-0.54106	3e-05			KCNAB1
cg02408496	-0.54078	3e-05			PRKCA
cg12045829	-0.54023	4e-05			TNFSF12
cg13785223	-0.54022	4e-05
cg05702597	-0.5393	4e-05			MME
cg22912040	-0.53924	4e-05	0.351	0.01082
cg16806041	-0.53873	4e-05			FHIT
cg21695167	-0.53865	4e-05	0.288	0.038278	RASA2
cg02091275	-0.53757	4e-05			CD247
cg08980081	-0.53726	4e-05
cg06857159	-0.5368	4e-05	0.368	0.007345	TNFRSF9
cg26647607	-0.53635	4e-05	-0.408	0.002658
cg10751631	-0.5359	4e-05	0.284	0.04147
cg02792921	-0.5352	4e-05			CD81
cg26601310	-0.53454	4e-05			PRR5L
cg15791967	-0.53439	4e-05			KCNA3
cg26241746	-0.53337	5e-05			ANXA13
cg26347359	-0.53261	5e-05			JADE1
cg06115214	-0.53259	5e-05			SPOCK1
cg00942920	-0.53223	5e-05	0.301	0.030188	LAX1
cg12299931	-0.53215	5e-05	0.426	0.001618
cg06364873	-0.53189	5e-05			CD3D
cg15345672	-0.5316	5e-05
cg15717448	-0.53155	5e-05
cg23548658	-0.53131	5e-05	0.447	0.000886	COLEC11
cg15871766	-0.53124	5e-05			ACVR1B
cg19535025	-0.53113	5e-05
cg21380380	-0.5305	5e-05			GLCCI1
cg01879861	-0.52993	5e-05			ARHGAP10
cg20016095	-0.52967	5e-05			CRPPA
cg03556068	-0.52932	5e-05	0.434	0.001294
cg20659188	-0.52906	6e-05	0.343	0.012896
cg17278281	-0.52895	6e-05
cg10825315	-0.52877	6e-05			TSHR
cg13203135	-0.52876	6e-05			GATD3
cg12682972	-0.52868	6e-05			MAP4K4
cg21061574	-0.52815	6e-05
cg01126931	-0.52742	6e-05			CAMK1D
cg22512636	-0.52705	6e-05
cg10603220	-0.5268	6e-05			LINC00640
cg13642872	-0.52656	6e-05			ACSBG1
cg21774804	-0.52572	6e-05			OLAH
cg02586212	-0.52513	6e-05			RGS1
cg03731316	-0.52506	6e-05			UST
cg11772086	-0.52455	7e-05			MCC
cg18109879	-0.52451	7e-05			OR14A16
cg09750210	-0.52417	7e-05
cg13662290	-0.52379	7e-05	0.463	0.000547	GIMAP4
cg27488741	-0.52344	7e-05			SULT2A1
cg09408629	-0.523	7e-05			TNFAIP3
cg14768892	-0.52256	7e-05	0.365	0.007808	FSIP1
cg25245744	-0.52226	7e-05
cg01943931	-0.52206	7e-05
cg15458017	-0.52173	7e-05
cg07738651	-0.5213	7e-05	0.597	3e-06
cg19852147	-0.52108	7e-05			WWOX
cg09083160	-0.52066	8e-05	0.407	0.002787	B4GALNT3
cg10117369	-0.5206	8e-05			LAX1
cg13068626	-0.52055	8e-05	0.436	0.001236	FAXC
cg23031196	-0.5204	8e-05			SLC38A1
cg03453351	-0.52024	8e-05	0.367	0.007513
cg23911637	-0.5201	8e-05
cg08972831	-0.51964	8e-05	-0.354	0.010133
cg13117582	-0.5192	8e-05
cg08729573	-0.51822	8e-05
cg17302393	-0.51768	8e-05	0.544	3e-05
cg17862288	-0.51741	9e-05
cg07219384	-0.51696	9e-05			MAN1A1
cg16378151	-0.51691	9e-05
cg03805787	-0.5168	9e-05	-0.307	0.026984	PRKCA
cg25417988	-0.51678	9e-05			MGAT4A
cg09022082	-0.51653	9e-05
cg20029201	-0.51582	9e-05			BCL9L
cg25715498	-0.51579	9e-05	0.297	0.032703	SLAMF6
cg03570948	-0.51524	9e-05			LOC100133308
cg15073708	-0.51489	9e-05	0.355	0.009845	CHD5
cg05117626	-0.51363	0.0001			WNT5B
cg13326354	-0.5136	0.0001
cg14829360	-0.51357	0.0001
cg12556057	-0.51338	0.0001	0.587	5e-06	SGCG
cg02475740	-0.51277	0.0001			SPINK2
cg24680646	-0.51206	0.0001			TRPC4
cg07199535	-0.5118	0.00011	0.395	0.00375
cg06197616	-0.51143	0.00011			MYO7B
cg07135941	-0.51139	0.00011			NRG1
cg17160506	-0.51113	0.00011	-0.361	0.008564	PRKCA
cg25012274	-0.51094	0.00011	0.274	0.049274	NTN1
cg07220815	-0.51073	0.00011			FRMD5
cg19964826	-0.5104	0.00011			PPP1R1C
cg19824502	-0.50986	0.00011	0.473	0.000396	CHRNA1
cg26736888	-0.50921	0.00012
cg17106625	-0.50888	0.00012	0.275	0.048138	PDLIM2
cg11306065	-0.50887	0.00012	-0.432	0.001386	MOGAT1
cg03707218	-0.50864	0.00012	0.283	0.042159
cg15074600	-0.50842	0.00012	0.331	0.016528
cg03391528	-0.5081	0.00012
cg11489384	-0.50771	0.00012	-0.353	0.010342
cg02486421	-0.50769	0.00012	0.377	0.005815
cg06820975	-0.50759	0.00012			KLHL2
cg02843331	-0.50722	0.00012			RNF169
cg09430664	-0.507	0.00013			RPS6KA2
cg24575415	-0.50635	0.00013	-0.296	0.033228
cg10030648	-0.50631	0.00013			SHISA6
cg15568074	-0.50607	0.00013			HLA-DRB1
cg19848641	-0.50594	0.00013
cg10729296	-0.50579	0.00013			JAG1
cg10708271	-0.50573	0.00013	-0.479	0.000326	CD200R1
cg17678867	-0.50543	0.00013			SYNE1
cg09027601	-0.50524	0.00013			FAM171A1
cg11625986	-0.50512	0.00013	-0.351	0.010689	CSGALNACT1
cg10172979	-0.5049	0.00014
cg01480218	-0.50481	0.00014
cg10808874	-0.50455	0.00014	-0.378	0.005739	PPP2R5C
cg26846755	-0.50422	0.00014			ITGB8
cg08307231	-0.50402	0.00014			RPTOR
cg11794767	-0.50388	0.00014
cg08817540	-0.50383	0.00014			HHLA2
cg05042435	-0.50378	0.00014	0.379	0.005618	BPIFB1
cg04891708	-0.50309	0.00014			RIPOR2
cg05485304	-0.50229	0.00015	0.321	0.020364	SLC35F3
cg00020383	-0.50208	0.00015			PCSK2
cg22559497	-0.50191	0.00015
cg20157127	-0.50188	0.00015	0.484	0.000279	LOC101929297
cg11112015	-0.50181	0.00015	0.322	0.019823	CACNA2D3
cg17583204	-0.50165	0.00015
cg09136854	-0.50163	0.00015
cg16247379	-0.50144	0.00015
cg25154586	-0.50137	0.00015			HPGD
cg04057161	-0.5011	0.00015
cg25210478	-0.501	0.00016
cg04211179	-0.50076	0.00016			ZBTB17
cg03091982	-0.50047	0.00016
cg08887746	-0.50021	0.00016			MIR3667HG
cg24018756	-0.49852	0.00017			IFITM5
cg08311647	-0.49839	0.00017			USP6NL
cg03514530	-0.49834	0.00017
cg23839599	-0.49829	0.00017	0.461	0.000591
cg16730825	-0.49826	0.00017			AP2A2
cg25609517	-0.49799	0.00017	-0.276	0.047914	WDR33
cg08046926	-0.49765	0.00017
cg24702467	-0.49722	0.00018			ETFA
cg23651889	-0.49721	0.00018			LPP
cg18762249	-0.49713	0.00018			RBFOX3
cg16836638	-0.49705	0.00018			VMP1
cg07772904	-0.49567	0.00019
cg03425812	-0.49551	0.00019			B2M
cg12030080	-0.49533	0.00019			ZDHHC14
cg11913346	-0.49522	0.00019	0.372	0.006601
cg02576157	-0.49487	0.00019
cg01529864	-0.49474	0.00019	0.482	0.000299
cg26666676	-0.49456	0.00019
cg10223809	-0.49455	0.00019	0.35	0.010971	CLEC12A
cg09829164	-0.49416	0.0002			RADIL
cg24921858	-0.4938	0.0002	0.3	0.030899	BCL2L14
cg21531089	-0.4938	0.0002			STPG1
cg25107984	-0.49374	0.0002
cg13126871	-0.49341	0.0002			PF4
cg05407981	-0.49277	0.00021			TRAK2
cg13340947	-0.4926	0.00021			SLC2A13
cg11474081	-0.49243	0.00021
cg08128264	-0.49212	0.00021
cg12967911	-0.49189	0.00021
cg04962480	-0.49176	0.00021			YWHAZ
cg13257857	-0.49148	0.00022	0.54	3.6e-05
cg01824466	-0.4914	0.00022			TP53INP1
cg24874254	-0.4913	0.00022	0.488	0.000247	PRDM1
cg17353680	-0.49115	0.00022			KCNK12
cg25104234	-0.49109	0.00022	0.371	0.006787
cg09076650	-0.49098	0.00022
cg15347131	-0.49083	0.00022
cg23231312	-0.49066	0.00022
cg21234506	-0.49062	0.00022			BCL2A1
cg18069911	-0.49014	0.00023	-0.332	0.016202	SYNE2
cg04724174	-0.49011	0.00023
cg19857138	-0.48996	0.00023
cg27257987	-0.48984	0.00023			PSG4
cg21089125	-0.48976	0.00023			RGS13
cg24994319	-0.48975	0.00023
cg02179473	-0.48963	0.00023
cg17254663	-0.48933	0.00023
cg24567196	-0.48912	0.00023
cg12828896	-0.48901	0.00023			B2M
cg16847766	-0.4886	0.00024			AGAP3
cg22381686	-0.48828	0.00024	0.376	0.006084
cg16267401	-0.48828	0.00024			GATB
cg07050033	-0.48774	0.00024	0.422	0.001857
cg17816357	-0.48751	0.00025	0.415	0.002197
cg25649765	-0.48741	0.00025	0.443	0.001012	GREB1
cg14651079	-0.48678	0.00025			LDB3
cg15312845	-0.48673	0.00025			PSG4
cg24338141	-0.48655	0.00025	0.387	0.004616
cg01167556	-0.48652	0.00026			DGKA
cg16407699	-0.48612	0.00026
cg10954372	-0.48553	0.00026			EPHA5
cg24579422	-0.48535	0.00027
cg17697226	-0.48492	0.00027
cg08744989	-0.48485	0.00027			CEP85L
cg07176692	-0.48471	0.00027			SLC16A1
cg15611912	-0.48399	0.00028	0.295	0.033791	RGS10
cg06294580	-0.48389	0.00028
cg11704582	-0.48375	0.00028			CNNM2
cg16361249	-0.48361	0.00028
cg00277065	-0.48359	0.00028			MTUS1
cg12220370	-0.48314	0.00029	0.403	0.003095	RBFOX3
cg11008123	-0.48308	0.00029			LOC283267
cg11849122	-0.48283	0.00029			DAB1
cg14624096	-0.48261	0.00029
cg10087780	-0.48261	0.00029
cg04233669	-0.48232	0.00029			LOC153328
cg17448192	-0.48199	0.0003	-0.371	0.006833	ST6GAL1
cg21672524	-0.48191	0.0003	-0.432	0.001395	ETFB
cg13212186	-0.48142	0.0003			HCG27
cg10396747	-0.48129	0.0003	-0.366	0.007646	PAPPA2
cg07805850	-0.48124	0.0003	0.281	0.043517	RBFOX3
cg13448797	-0.48099	0.00031			ETS1
cg25969814	-0.48063	0.00031	0.469	0.000448	SV2B
cg21693464	-0.48047	0.00031			CD6
cg02093161	-0.48029	0.00031	0.334	0.015364
cg09199323	-0.47979	0.00032			SLC38A1
cg20664974	-0.47918	0.00033			HNF4A
cg15474337	-0.47905	0.00033			NAPSB
cg25084281	-0.47876	0.00033
cg25179256	-0.47856	0.00033	0.45	0.000811	LOC284395
cg09997171	-0.47836	0.00033			HSD17B6
cg06174271	-0.47832	0.00034	0.406	0.002816	MROH5
cg23643526	-0.47829	0.00034			HAO2
cg18646441	-0.47796	0.00034			LOC101927870
cg04268125	-0.47767	0.00034			ADAR
cg13962347	-0.47665	0.00035	0.36	0.00873	LYRM4
cg03752203	-0.47657	0.00035			AZIN1
cg25998967	-0.47613	0.00036	0.286	0.039533	REV3L
cg02448395	-0.47591	0.00036	0.302	0.029746	ESPNL
cg17394978	-0.47558	0.00037			IRF1
cg15577010	-0.47479	0.00038			NMUR1
cg17177837	-0.4744	0.00038
cg20218843	-0.47438	0.00038			STAB2
cg16802137	-0.47437	0.00038			SLC38A1
cg15274823	-0.47429	0.00038
cg12622242	-0.47368	0.00039			SH2D4A
cg24416652	-0.47367	0.00039	0.3	0.030786	ADPGK
cg14760149	-0.47363	0.00039	0.294	0.034386
cg27220932	-0.47363	0.00039
cg05292605	-0.47352	0.00039			LTBP2
cg24699914	-0.47349	0.00039
cg23007665	-0.4731	0.0004	-0.463	0.000546	COA1
cg15475602	-0.47308	0.0004			MTSS1
cg14139038	-0.47307	0.0004			HSD11B1
cg00263240	-0.47293	0.0004	0.276	0.047274
cg12667043	-0.47291	0.0004			LOC101929680
cg07368857	-0.47282	0.0004	0.459	0.000623	FOXP1
cg19055411	-0.47268	0.0004	0.379	0.005613
cg14116294	-0.47266	0.0004			GGTA2P
cg04551914	-0.47265	0.0004			OR2H1
cg23676423	-0.47245	0.00041
cg01775558	-0.47222	0.00041	-0.575	8e-06
cg19367859	-0.47216	0.00041
cg02906335	-0.47194	0.00041			PAX5
cg20727127	-0.47176	0.00041			GPR176
cg14264316	-0.47162	0.00042
cg09638473	-0.47151	0.00042	0.287	0.038816
cg18597176	-0.47149	0.00042
cg26484127	-0.47148	0.00042
cg07660753	-0.47125	0.00042			PAPPA
cg27021553	-0.47118	0.00042			CCND1
cg00839032	-0.47106	0.00042			OPRD1
cg00155667	-0.47086	0.00043
cg05262957	-0.47071	0.00043			RERE
cg11899614	-0.47042	0.00043			HNF4A
cg05029454	-0.4699	0.00044
cg19248264	-0.46986	0.00044			RPA1
cg16658255	-0.46962	0.00044
cg08894020	-0.46947	0.00045	0.325	0.018786
cg06016427	-0.46939	0.00045			DCK
cg21361021	-0.46938	0.00045	0.279	0.045172	KIF3B
cg22114934	-0.46908	0.00045	0.398	0.003469	CD52
cg17327157	-0.46885	0.00046
cg18436378	-0.46825	0.00046
cg24143305	-0.4681	0.00047	-0.372	0.006547	HLA-DQA1	HLA genes play role in various psychiatric disorders including SCZ and in treatment response (review in e.g. Tamouza et al., Brain Behav Immun 2021)
cg03714923	-0.46776	0.00047
cg02760152	-0.46768	0.00047			DAB1
cg12919873	-0.46764	0.00047	0.361	0.008466
cg06049774	-0.46755	0.00047			PLAC9
cg02107305	-0.46714	0.00048
cg26312935	-0.46712	0.00048	0.563	1.4e-05	RNF111
cg18622075	-0.46671	0.00049	0.303	0.02889	PCLO
cg09231580	-0.4667	0.00049	0.301	0.030168	SLC6A12
cg18726748	-0.46669	0.00049
cg18412521	-0.46649	0.00049
cg27560327	-0.46612	0.0005
cg04433322	-0.46581	0.0005			SLC4A1
cg19710271	-0.46498	0.00051
cg14184379	-0.46473	0.00052			LOC102723661
cg21950330	-0.4645	0.00052			ANKDD1A
cg09433113	-0.46427	0.00053	0.36	0.008697	CREB5
cg06526366	-0.46394	0.00053			MIR3134
cg16611564	-0.46388	0.00053	0.584	6e-06
cg18777311	-0.46361	0.00054			PPP4R2
cg15255086	-0.46294	0.00055
cg01624348	-0.46281	0.00055			DLC1
cg10224245	-0.46278	0.00055	0.381	0.005276	GPC6
cg15172739	-0.46269	0.00055	0.363	0.008261	SNHG1
cg23779604	-0.46265	0.00055
cg15624719	-0.46234	0.00056
cg15123519	-0.46227	0.00056	0.422	0.00181	LCT
cg17163363	-0.46214	0.00056	0.52	7.8e-05	OR52B2
cg07011310	-0.46202	0.00056
cg12048225	-0.46188	0.00057			PSMB8
cg27210166	-0.46175	0.00057			RPTOR
cg11737871	-0.46161	0.00057	0.321	0.020136	PRAMEF12
cg26815336	-0.46159	0.00057
cg17113784	-0.46113	0.00058	-0.342	0.01294	AMOTL1
cg08808097	-0.46092	0.00058
cg01395890	-0.46081	0.00059			LOC101926941
cg26531664	-0.46056	0.00059
cg05951984	-0.46034	0.0006			TPCN2
cg00197431	-0.46023	0.0006	-0.296	0.032875	EXOC4
cg25792397	-0.4597	0.00061
cg22316081	-0.45887	0.00062			GATC
cg15042082	-0.4586	0.00063
cg00531137	-0.45836	0.00063	0.508	0.000121
cg09082493	-0.45828	0.00063	0.545	2.9e-05	EML1
cg24693741	-0.45827	0.00063			DYM
cg16203592	-0.45827	0.00063			TMEM154
cg08584845	-0.45825	0.00063
cg07146524	-0.45823	0.00064	0.536	4.2e-05
cg11477175	-0.45822	0.00064
cg20724476	-0.45764	0.00065
cg12201043	-0.45756	0.00065			LINC00244
cg18444006	-0.45734	0.00065			SLC35F4
cg19571244	-0.45668	0.00067
cg02283931	-0.4565	0.00067			SDR42E1
cg17661798	-0.45632	0.00067
cg12155450	-0.45627	0.00067			NAT14
cg03716125	-0.45599	0.00068
cg24242384	-0.45583	0.00068			HLA-DRB1
cg15344028	-0.45581	0.00068			ICOS
cg11879424	-0.45566	0.00069	-0.457	0.00067
cg22126849	-0.4553	0.0007	0.313	0.024041
cg07750604	-0.45492	0.0007
cg20538800	-0.4549	0.0007
cg15408080	-0.45487	0.0007
cg01049849	-0.45474	0.00071	0.422	0.001838	CASZ1
cg09981964	-0.45464	0.00071			CNTNAP2
cg22368454	-0.45458	0.00071			GDE1
cg15047198	-0.45439	0.00071			NFKB1
cg19200197	-0.45407	0.00072			RFTN2
cg15937784	-0.45404	0.00072			MIR526A2
cg13527652	-0.45393	0.00072
cg20517941	-0.45389	0.00073			AOX2P
cg04150429	-0.4531	0.00074			ANXA6
cg12555062	-0.453	0.00075			AGBL4
cg05880029	-0.45292	0.00075			SLC16A9
cg21427227	-0.45264	0.00075			DOP1B
cg06506328	-0.45248	0.00076			CTNNA3
cg25755851	-0.45241	0.00076	-0.279	0.044879
cg24229798	-0.45219	0.00076			GPR20
cg13193370	-0.45191	0.00077	0.347	0.011667
cg09771371	-0.45172	0.00078	0.362	0.00839	LINC00299
cg24478129	-0.45096	0.00079			SMYD3
cg03363685	-0.45092	0.00079			SOX5
cg21683053	-0.45089	0.00079
cg19242610	-0.4506	0.0008	0.301	0.030052	FCGR2C
cg12088417	-0.45038	0.00081			RPTOR
cg14178991	-0.45037	0.00081			RCHY1
cg05962950	-0.45032	0.00081			SNX19
cg00592046	-0.44983	0.00082
cg18287701	-0.44978	0.00082			PIGT
cg19892088	-0.44966	0.00083
cg14542879	-0.44937	0.00083
cg16053332	-0.44931	0.00083	0.451	0.000786	LOC101929378
cg21584846	-0.44905	0.00084	0.346	0.011883
cg03989273	-0.44904	0.00084			TCF7
cg01910713	-0.449	0.00084			MICAL3
cg05144700	-0.44899	0.00084	0.322	0.019947
cg26191447	-0.44891	0.00084
cg15984594	-0.4488	0.00085			COLGALT2
cg10907868	-0.4488	0.00085
cg23203918	-0.4486	0.00085
cg27422240	-0.4482	0.00086	0.433	0.001361
cg22234943	-0.44799	0.00087			SNX19
cg04424088	-0.44752	0.00088	0.291	0.03643	IQUB
cg19739774	-0.44746	0.00088			RPA3
cg22895981	-0.44733	0.00088
cg02327497	-0.44726	0.00089			XPO5
cg22036538	-0.44699	0.00089			CD27
cg09426164	-0.44696	0.00089	0.299	0.031103	GRIK4
cg14392772	-0.44676	0.0009			TRAF1
cg02634805	-0.44674	0.0009	0.309	0.026036
cg05929294	-0.44658	0.0009
cg08983814	-0.44635	0.00091			LINC01483
cg09237121	-0.44598	0.00092	0.358	0.009234
cg19021236	-0.44591	0.00092			MICAL3
cg02884195	-0.44586	0.00092
cg01697159	-0.44562	0.00093	0.404	0.002997
cg06241101	-0.44543	0.00094
cg09974432	-0.44533	0.00094			PTPN14
cg23208066	-0.44533	0.00094
cg14372705	-0.44516	0.00094
cg08655952	-0.44501	0.00095
cg11010744	-0.44466	0.00096
cg12503949	-0.44466	0.00096
cg11421779	-0.44443	0.00096			CMYA5
cg04578283	-0.44433	0.00097			CALCOCO1
cg15005139	-0.44432	0.00097			LOC101927070
cg05848894	-0.44417	0.00097
cg19738233	-0.44407	0.00097			DNAJC24
cg12801030	-0.44377	0.00098	0.343	0.012882
cg12608507	-0.44374	0.00098			EEF1B2
cg26862981	-0.44371	0.00099			ZHX2
cg01493678	-0.44356	0.00099			HLA-DOB
cg13081429	-0.44347	0.00099			NID1
cg11075561	-0.44317	0.001
cg20185773	-0.44316	0.001
cg18203974	-0.4431	0.001	0.522	7.2e-05
cg13521643	-0.44293	0.00101			DNAJC25-GNG10
cg09241703	-0.44253	0.00102			FOXN3
cg17262642	-0.44248	0.00102			BCL11B
cg23876203	-0.44235	0.00103			HOXA3
cg06612594	-0.44225	0.00103			STK4
cg06465736	-0.44192	0.00104			LINC00929
cg01330829	-0.44176	0.00104	-0.342	0.01318
cg17017814	-0.44173	0.00104			OR4A47
cg18550810	-0.4417	0.00105
cg24075990	-0.44159	0.00105	0.397	0.003599
cg15967253	-0.44155	0.00105			LCE1D
cg08260395	-0.44135	0.00106			NWD1
cg01940593	-0.44131	0.00106
cg08131721	-0.44128	0.00106
cg21516937	-0.44104	0.00107
cg21873124	-0.44103	0.00107
cg14397434	-0.44091	0.00107	0.508	0.000122	RYR2
cg04802986	-0.44062	0.00108			LGR6
cg05901920	-0.4406	0.00108	0.346	0.011956	ESRRG
cg10529555	-0.44026	0.00109	0.291	0.036654
cg03457281	-0.44006	0.0011
cg06805844	-0.43995	0.0011	-0.458	0.000647	DOCK7
cg27000335	-0.43977	0.00111			PLSCR4
cg00251875	-0.43957	0.00111			AFAP1
cg14532484	-0.43918	0.00113			PAEP
cg00943291	-0.43898	0.00113			PLEKHG3
cg11136592	-0.43886	0.00114			AKR1C4
cg15607737	-0.4388	0.00114			LOC105376360
cg21387009	-0.43875	0.00114	-0.34	0.013701	IRAK2
cg06023941	-0.43872	0.00114			ARL15
cg00374627	-0.43856	0.00115			SLC35F3
cg10270211	-0.43844	0.00115
cg18244459	-0.43811	0.00116
cg22388096	-0.43809	0.00116			SNTB1
cg15263617	-0.43808	0.00116			GPCPD1
cg05128516	-0.43806	0.00116	0.284	0.041165	MYH9
cg00707127	-0.43794	0.00117
cg24315782	-0.43787	0.00117
cg16801601	-0.43743	0.00118			PRKCQ
cg12033075	-0.43724	0.00119			PIK3CD
cg10739948	-0.43719	0.00119
cg24140133	-0.43709	0.0012
cg12052601	-0.43675	0.00121			LONRF2
cg25912682	-0.43661	0.00121	0.377	0.005936	ARHGAP44
cg17348514	-0.43651	0.00122	0.453	0.000751	MED15
cg12382697	-0.43647	0.00122			HMCN1
cg17793880	-0.43632	0.00122
cg08010669	-0.43625	0.00122
cg14041812	-0.43623	0.00123	-0.329	0.017112	PALLD
cg19214707	-0.43608	0.00123
cg11256920	-0.43602	0.00123
cg02717503	-0.43598	0.00123
cg02375244	-0.43593	0.00124	0.605	2e-06	DGKI
cg00097237	-0.4359	0.00124
cg01824680	-0.43579	0.00124
cg05523882	-0.43516	0.00126			AARS1
cg03006193	-0.43496	0.00127			MAD1L1
cg08918582	-0.4347	0.00128			MCF2L
cg02909570	-0.43468	0.00128
cg13827835	-0.43458	0.00129	-0.367	0.007378
cg20154216	-0.4344	0.00129			UBTFL1
cg08711005	-0.43425	0.0013
cg17155687	-0.43421	0.0013
cg02968327	-0.43405	0.00131			IL16
cg04779233	-0.43403	0.00131	-0.351	0.010689
cg19866026	-0.43384	0.00131			PPP2R5E
cg19102718	-0.43383	0.00131	0.459	0.000613
cg13827123	-0.43377	0.00132	0.422	0.001848	GPC6
cg14429807	-0.43346	0.00133			VAV2
cg06353036	-0.43342	0.00133			KIAA2026
cg15762187	-0.43337	0.00133	0.377	0.005923	CRTAC1
cg23342766	-0.43327	0.00133
cg10941775	-0.43324	0.00134			BTBD11
cg20417154	-0.43318	0.00134			SNRNP35
cg09113298	-0.43317	0.00134
cg23077515	-0.43315	0.00134	-0.284	0.041535	PDS5B
cg12184221	-0.433	0.00135			TMEM39A
cg09520037	-0.43296	0.00135	-0.348	0.011423	ZHX2
cg06114320	-0.43295	0.00135	-0.43	0.001481	HPCAL1
cg25154462	-0.43291	0.00135
cg15370054	-0.43283	0.00135			SPATA4
cg20575254	-0.43262	0.00136	-0.308	0.026131
cg25458600	-0.43254	0.00136			LCE1D
cg05032297	-0.43243	0.00137
cg00161556	-0.43233	0.00137			ZDHHC13
cg18576936	-0.4322	0.00138
cg03325206	-0.43208	0.00138			LOC284344
cg19194482	-0.43171	0.0014			HHIP
cg05004720	-0.43168	0.0014			EDAR
cg22804805	-0.43162	0.0014			SLC4A2
cg03090301	-0.43146	0.00141			SPARCL1
cg22701297	-0.43127	0.00141	0.285	0.040476	SLC17A8
cg02392269	-0.43102	0.00142			PARVA
cg13312387	-0.43097	0.00143			NMUR1
cg02873991	-0.43064	0.00144	0.349	0.011247	LINC02909
cg02429487	-0.43061	0.00144
cg20630551	-0.43059	0.00144			COL15A1
cg26893022	-0.43044	0.00145			LINC01258
cg18974499	-0.43036	0.00145
cg02518222	-0.43033	0.00145			HSD17B11
cg08817883	-0.43027	0.00145
cg11136522	-0.43009	0.00146
cg16083541	-0.42999	0.00147
cg09518270	-0.42997	0.00147			KCNH1
cg17767224	-0.42982	0.00147	0.48	0.000316	LINC01440
cg04590119	-0.42973	0.00148			CHRM2
cg15959157	-0.42968	0.00148	0.428	0.001558
cg16312655	-0.42944	0.00149			SLC38A1
cg13634319	-0.42928	0.0015			DGKA
cg13723078	-0.42922	0.0015
cg08904058	-0.42904	0.00151	0.362	0.008418	FAM189A1
cg01203147	-0.42899	0.00151			LINC01280
cg09645818	-0.42896	0.00151
cg05606799	-0.42855	0.00153			KISS1
cg00193947	-0.4284	0.00153			LINC00474
cg26640119	-0.42828	0.00154	-0.293	0.034864
cg14413680	-0.42788	0.00156
cg16699540	-0.42744	0.00157
cg04370983	-0.4272	0.00159			RAD21
cg04309942	-0.42699	0.00159
cg12461082	-0.42676	0.00161			OXSR1
cg06314883	-0.42673	0.00161			FARS2
cg23218897	-0.42664	0.00161	0.34	0.013749	SMG6
cg20396557	-0.42647	0.00162	0.508	0.000121	FOXP1
cg10146330	-0.42642	0.00162			TTLL8
cg03106056	-0.4264	0.00162	-0.323	0.019331	MARCHF4
cg25422992	-0.4264	0.00162			SNX8
cg18162549	-0.42625	0.00163	-0.376	0.006046	LINC00613
cg14138609	-0.42625	0.00163			RPTOR
cg01416229	-0.42619	0.00163
cg20397360	-0.42567	0.00165			EPAS1
cg14055835	-0.42545	0.00167			FCAR
cg17528557	-0.42502	0.00169	-0.294	0.034266	MICB
cg06367823	-0.42497	0.00169			SRRM4
cg10294253	-0.42489	0.00169
cg00443133	-0.42473	0.0017			LOC101927488
cg09199338	-0.42452	0.00171			LINC01098
cg22794841	-0.42444	0.00171			MYRFL
cg03132807	-0.42432	0.00172			RSPH9
cg02763813	-0.42425	0.00172			CRTAM
cg25234359	-0.42413	0.00173	-0.33	0.017045	REX1BD
cg19119962	-0.42401	0.00173			RYR2
cg16458822	-0.42387	0.00174			ENOX1
cg20626896	-0.42381	0.00174	0.412	0.002385	LETMD1
cg11920115	-0.42371	0.00175			RBFOX1
cg13093842	-0.4237	0.00175			NLRP2
cg16781287	-0.42351	0.00176			UBE4A
cg08585488	-0.42332	0.00177	0.334	0.015395	PLEKHG1
cg02696067	-0.42294	0.00179	-0.417	0.002121	DDR1
cg15652717	-0.42292	0.00179
cg03982376	-0.4228	0.00179	0.313	0.024037	ZC3H12D
cg13957160	-0.42274	0.0018			OTOF
cg08090782	-0.42246	0.00181	0.591	4e-06
cg04194328	-0.42244	0.00181	0.465	0.000515	MAPT
cg24924624	-0.42207	0.00183	0.374	0.006248
cg10184387	-0.42195	0.00184
cg07227024	-0.42182	0.00184			FLACC1
cg25038473	-0.4218	0.00184			IPCEF1
cg10224997	-0.42166	0.00185
cg27219748	-0.42159	0.00185	0.288	0.038623
cg27621870	-0.42127	0.00187	0.552	2.2e-05
cg22281120	-0.42117	0.00188	0.471	0.000431	INSR
cg11858499	-0.42104	0.00188	-0.32	0.020904	A4GALT
cg21816963	-0.42094	0.00189			PTPRO
cg16518861	-0.42069	0.0019	0.599	3e-06	NFKBIA
cg01239651	-0.42028	0.00192	0.526	6.3e-05	PIK3R1
cg11705415	-0.42026	0.00192			DNAJC6
cg09576161	-0.41992	0.00194
cg18283187	-0.4196	0.00196			NR2F2-AS1
cg03090869	-0.41958	0.00196
cg04329478	-0.41956	0.00196			LOC400696
cg08681877	-0.41947	0.00196			ARHGAP15
cg19236776	-0.41934	0.00197			MIR3163
cg05328885	-0.41933	0.00197			DCDC1
cg06785701	-0.41928	0.00198			LOC407835
cg20570464	-0.41927	0.00198			HIVEP3
cg03218115	-0.41917	0.00198			AMBRA1
cg04829448	-0.41911	0.00198			SPINK5
cg03081173	-0.41903	0.00199			HCG27
cg25270367	-0.41902	0.00199			TNXB
cg14529767	-0.41899	0.00199
cg23256882	-0.41893	0.00199
cg05045498	-0.41867	0.00201
cg00307819	-0.41866	0.00201			FAM117A
cg04208100	-0.41855	0.00202	0.36	0.008755
cg18825221	-0.41855	0.00202			RAD51B
cg02346118	-0.41813	0.00204	0.289	0.038012	GNAO1
cg16622061	-0.41812	0.00204	0.38	0.005465
cg13440864	-0.41798	0.00205			RAP1A
cg18650908	-0.41797	0.00205			MACROD2
cg12859840	-0.41786	0.00205			PHC2
cg09757087	-0.41759	0.00207			IFT140
cg00504629	-0.41743	0.00208	0.37	0.006974	PPP5D1P
cg13761615	-0.4169	0.00211			MCC
cg09232650	-0.41677	0.00212			ANK1
cg12306427	-0.41674	0.00212	0.3	0.030914	GFOD1
cg19688022	-0.41674	0.00212			LINC00642
cg09561822	-0.4167	0.00212			BIN3
cg12078458	-0.41665	0.00212			KIFC3
cg21674595	-0.41642	0.00214			C12orf54
cg16119183	-0.41628	0.00214	-0.299	0.031135	LINC01082
cg06051312	-0.4161	0.00215			PPP4R2
cg16635945	-0.41605	0.00216
cg08028452	-0.41599	0.00216			CACNA1D
cg17896072	-0.4159	0.00217			BARX2
cg05813131	-0.41582	0.00217			SRRM4
cg16406611	-0.41564	0.00218			IFITM5
cg21855257	-0.41543	0.00219			IFI16
cg26619624	-0.41519	0.00221			DLX5
cg15056551	-0.41466	0.00224
cg07392307	-0.41451	0.00225	0.536	4.2e-05	SFTPA2
cg26341465	-0.41442	0.00225			PHACTR3
cg27335653	-0.4143	0.00226	0.494	0.0002	CFAP300
cg26389285	-0.41409	0.00228			MYO1E
cg10041288	-0.41402	0.00228			NCK2
cg02288976	-0.41396	0.00228			ARID3A
cg15382620	-0.41394	0.00228
cg08870893	-0.41373	0.0023	0.292	0.035596	AARD
cg13168499	-0.41371	0.0023			PRRC2B
cg20643422	-0.41361	0.00231			CELA2B
cg01309328	-0.41331	0.00232	0.35	0.010942	PSMB8
cg21562973	-0.4133	0.00232	0.323	0.019429
cg22337407	-0.41318	0.00233
cg22237952	-0.41311	0.00234
cg24256225	-0.41311	0.00234
cg00507953	-0.4129	0.00235
cg13868872	-0.41289	0.00235
cg05025211	-0.41288	0.00235	0.413	0.002338	LCN9
cg20061837	-0.41277	0.00236	0.307	0.026669
cg06647782	-0.41276	0.00236	-0.307	0.02694	ARHGEF19
cg06556439	-0.41252	0.00237			LIMA1
cg13787670	-0.4125	0.00237
cg05999251	-0.41229	0.00239	0.407	0.002736	NLGN1
cg01610676	-0.41229	0.00239
cg12880274	-0.41201	0.00241
cg11417323	-0.412	0.00241	-0.493	0.000207	NFYC
cg08835888	-0.41192	0.00241
cg27547377	-0.41157	0.00243
cg10940969	-0.41148	0.00244
cg24522768	-0.41137	0.00245	0.32	0.020924
cg03897823	-0.41134	0.00245			SEC22A
cg16706004	-0.41121	0.00246
cg16528039	-0.41119	0.00246
cg09672255	-0.41114	0.00246			ZNF879
cg08406547	-0.41084	0.00248	0.508	0.000123
cg21413867	-0.41072	0.00249	0.385	0.004867
cg18472223	-0.41062	0.0025			AOX2P
cg24003508	-0.41062	0.0025			KLF6
cg00520378	-0.41032	0.00252			CTU2
cg04279411	-0.41026	0.00252	0.401	0.003183
cg26435575	-0.41015	0.00253
cg12401953	-0.40996	0.00254			SPOCK1
cg01190919	-0.40992	0.00254			GMEB2
cg11855710	-0.40977	0.00255	0.479	0.000329
cg00568384	-0.40943	0.00258	0.288	0.03868
cg08421632	-0.40913	0.0026			ANLN
cg06974428	-0.40909	0.0026	0.314	0.023356	PIP4K2A
cg01916697	-0.40885	0.00262			ABLIM3
cg09972634	-0.40876	0.00262
cg18621766	-0.40872	0.00263	0.51	0.000113
cg18467790	-0.4086	0.00264			RADIL
cg18802615	-0.40855	0.00264			MYBPHL
cg11992079	-0.40853	0.00264	-0.389	0.00438	INPP5B
cg14357425	-0.40808	0.00267	0.317	0.022031
cg04628938	-0.4079	0.00269	0.378	0.005799	BCAS3
cg01232267	-0.40783	0.00269
cg04444303	-0.4078	0.00269
cg17196155	-0.4077	0.0027			XRCC2
cg15505534	-0.40724	0.00273
cg11221803	-0.40717	0.00274			TRIM45
cg06096850	-0.40716	0.00274	0.384	0.004968	GRP
cg26344818	-0.40711	0.00274	0.277	0.046542
cg20231299	-0.40707	0.00275			FUT2
cg11975790	-0.40697	0.00275			DDR1
cg16523850	-0.40682	0.00276
cg20955839	-0.40666	0.00277	0.45	0.000821	SULT1C2
cg03352418	-0.40642	0.00279			SLC6A2
cg08128089	-0.40602	0.00282	0.335	0.015148	PWRN4
cg12487162	-0.40573	0.00284			TEAD1
cg07130381	-0.40567	0.00285
cg05355592	-0.40562	0.00285			PTPRG
cg01046945	-0.40532	0.00287			SH3BP1
cg24573261	-0.4052	0.00288	0.327	0.017949	HLCS
cg11835015	-0.40517	0.00289
cg11835200	-0.40506	0.00289			LCE1D
cg03051742	-0.40497	0.0029
cg02323453	-0.40485	0.00291
cg16055189	-0.4048	0.00291
cg05126514	-0.40469	0.00292			BSN
cg12474444	-0.40468	0.00292
cg13365022	-0.4046	0.00293	0.433	0.001346	MC4R
cg11722878	-0.40439	0.00295	0.295	0.033585	WDR25
cg21076026	-0.40436	0.00295			TAT-AS1
cg04846421	-0.40432	0.00295
cg03983506	-0.40414	0.00296
cg02184540	-0.40401	0.00298			ZNRD1ASP
cg00050898	-0.40399	0.00298			MFSD4A
cg01993952	-0.40387	0.00299	-0.332	0.016081	MTUS1
cg09409898	-0.40386	0.00299			SMG6
cg18013336	-0.40381	0.00299			DCBLD1
cg18137779	-0.40371	0.003
cg14846609	-0.40369	0.003			CNGB3
cg27460717	-0.40318	0.00304	0.364	0.008064
cg04895001	-0.40308	0.00305	0.356	0.009638	OR2AG1
cg24830575	-0.40293	0.00306	0.569	1.1e-05
cg20205474	-0.4029	0.00306
cg05180009	-0.40279	0.00307	0.29	0.036707	CDH13
cg08518229	-0.40251	0.00309
cg15167488	-0.40241	0.0031			RYR2
cg06576557	-0.40229	0.00311			BPIFA1
cg20149337	-0.40229	0.00311			MYOM2
cg04040637	-0.40225	0.00312			LINC01237
cg10186864	-0.40194	0.00314	0.348	0.011483
cg15044663	-0.40178	0.00315			LOC338797
cg25334823	-0.40176	0.00316	0.503	0.000147
cg19759847	-0.40165	0.00316			MKS1
cg08746853	-0.40161	0.00317			H4-16
cg00837987	-0.40147	0.00318
cg11523071	-0.40137	0.00319	-0.403	0.003083
cg10062465	-0.40117	0.0032
cg07965822	-0.40106	0.00321	-0.278	0.045692	GALNT12
cg15444831	-0.401	0.00322
cg07821509	-0.40086	0.00323	0.28	0.044108	EVA1A
cg02701505	-0.40084	0.00323			LINC01252
cg08289350	-0.40081	0.00323			CYGB
cg11946459	-0.40075	0.00324			HLA-A
cg17708685	-0.40045	0.00326			C20orf204
cg20117275	-0.40042	0.00327			RNF39
cg16224321	-0.40023	0.00328
cg16409335	-0.40021	0.00328	-0.44	0.001091	CPSF4
cg27012108	-0.40014	0.00329	0.664	0
cg23856762	-0.40001	0.0033			TCERG1L
cg05217213	-0.39984	0.00332	-0.274	0.049274	AKIRIN2
cg24859589	-0.39975	0.00332
cg14082886	-0.39973	0.00333			CD44
cg13256036	-0.39947	0.00335	0.353	0.010199	BPI
cg20325573	-0.39931	0.00336	0.277	0.04704
cg05189524	-0.39927	0.00337			CACNA1E
cg14551458	-0.39911	0.00338	0.301	0.030351
cg13764124	-0.39897	0.00339	-0.279	0.04487
cg03283080	-0.39862	0.00342
cg04768606	-0.39781	0.00349
cg04700217	-0.39773	0.0035
cg02842922	-0.3977	0.00351
cg01022501	-0.39741	0.00353	-0.299	0.031524	RIN3
cg22706106	-0.39739	0.00353	0.534	4.5e-05	S100A13
cg23374665	-0.39723	0.00355	0.384	0.004945	POLR3H
cg00935887	-0.39721	0.00355	-0.301	0.0302
cg11068273	-0.39702	0.00357
cg24120210	-0.39695	0.00357			RADIL
cg11191567	-0.39687	0.00358
cg13753370	-0.39684	0.00358	-0.297	0.032539
cg24354866	-0.39673	0.00359	0.373	0.006484	DNAH11
cg25636439	-0.39662	0.0036			HIVEP2
cg25453225	-0.39652	0.00361			MPP6
cg21902846	-0.39651	0.00361			CCDC92
cg00063608	-0.39643	0.00362			PTK2B
cg26128464	-0.39642	0.00362			LCLAT1
cg20553277	-0.39639	0.00362			UNC5C
cg24868122	-0.39635	0.00363	-0.346	0.011967	ARHGAP26
cg02466728	-0.39629	0.00363
cg07030704	-0.39612	0.00365	-0.386	0.004709
cg23983887	-0.39604	0.00366			VPS13D
cg12669731	-0.39602	0.00366	0.433	0.001337
cg17149765	-0.39601	0.00366			LOC100506457
cg05330471	-0.39597	0.00366
cg10214340	-0.39595	0.00367			ELP4
cg08275953	-0.39592	0.00367	-0.334	0.015446
cg04332058	-0.39586	0.00367			ACIN1
cg27115973	-0.39586	0.00367			KCNQ1
cg27659796	-0.39541	0.00372			ABR
cg05791548	-0.39538	0.00372
cg22365757	-0.39508	0.00375	0.305	0.028025	LCE1D
cg09538156	-0.39504	0.00375	0.553	2.1e-05
cg22459531	-0.39465	0.00379	0.567	1.2e-05	KSR2
cg23346945	-0.39462	0.00379
cg11682724	-0.39455	0.0038
cg22106220	-0.3945	0.0038			LRP5L
cg04133707	-0.3944	0.00381
cg13067992	-0.39432	0.00382
cg16733226	-0.39431	0.00382			CAMK1D
cg22210251	-0.39423	0.00383
cg16014655	-0.39398	0.00385	0.524	6.8e-05
cg12185836	-0.39391	0.00386			RBP4
cg16914890	-0.39387	0.00387	-0.35	0.010931
cg16162930	-0.39357	0.00389
cg23549331	-0.39347	0.0039
cg01780345	-0.39329	0.00392			CFAP58
cg09601788	-0.39278	0.00397
cg15229014	-0.39273	0.00398	0.325	0.018576
cg25260934	-0.39262	0.00399			PDE4D
cg02558542	-0.39259	0.00399
cg03873518	-0.39255	0.004			GRAMD4
cg19990229	-0.3925	0.004			CCNO
cg02444957	-0.39187	0.00407			ANTXR1
cg19652483	-0.39183	0.00407	0.555	2e-05	FILIP1
cg02132783	-0.39179	0.00407	0.294	0.034428	C1orf141
cg17162911	-0.39174	0.00408			DLC1
cg18366758	-0.39171	0.00408
cg19268652	-0.39167	0.00409	-0.478	0.000334	HIVEP1
cg20368463	-0.39164	0.00409			SLC66A2
cg02943305	-0.39162	0.00409	-0.633	0	ITPRID1
cg06036775	-0.39154	0.0041
cg01604590	-0.39147	0.00411
cg07819162	-0.39146	0.00411	0.298	0.031986
cg15140557	-0.39143	0.00411			WDR1
cg02672830	-0.39131	0.00412			MCPH1
cg25360547	-0.39122	0.00413			CYTIP
cg04206499	-0.39104	0.00415	-0.496	0.000182	ARF1
cg12774454	-0.391	0.00416	-0.366	0.007652	ABLIM2
cg26854658	-0.39093	0.00416	0.289	0.037797
cg18954658	-0.39089	0.00417
cg12008779	-0.39088	0.00417	0.274	0.049132	QKI
cg18826771	-0.39087	0.00417			AOAH
cg23392381	-0.39085	0.00417			CTNNA2
cg00446965	-0.39081	0.00418	-0.311	0.024914
cg14520761	-0.39054	0.0042			WWTR1
cg20562666	-0.39054	0.0042
cg01630032	-0.39049	0.00421			WWOX
cg00191957	-0.39033	0.00423			LRRC73
cg05373962	-0.39028	0.00423
cg21830185	-0.3902	0.00424			GLOD4
cg11434671	-0.38999	0.00426	0.353	0.01027	CYGB
cg06758847	-0.38997	0.00427			PSD3
cg06449899	-0.38983	0.00428			SNX29
cg15111296	-0.38973	0.00429
cg21489194	-0.38959	0.00431	0.301	0.030262	EBF1
cg16716888	-0.38953	0.00431			OR1E2
cg16988212	-0.38947	0.00432			SORCS2
cg26912576	-0.38942	0.00432
cg01529471	-0.38931	0.00434	0.522	7.3e-05
cg04957662	-0.38925	0.00434
cg10899018	-0.38916	0.00435	0.36	0.008774	DEFB115
cg23639660	-0.38906	0.00436
cg15519318	-0.38904	0.00437
cg17339852	-0.38902	0.00437
cg03021137	-0.3886	0.00441
cg11237988	-0.38854	0.00442			GSK3B
cg23349354	-0.38834	0.00444
cg12087221	-0.38832	0.00445	0.455	0.000691
cg26420724	-0.38789	0.00449
cg16139219	-0.38778	0.00451			HOXA-AS3
cg00663111	-0.38755	0.00453	-0.372	0.006545	RIPK1
cg16469353	-0.38749	0.00454
cg20675222	-0.38739	0.00455	0.428	0.001544	OVCH2
cg07190378	-0.3869	0.00461
cg13011801	-0.38682	0.00461			DMBT1
cg15561493	-0.38681	0.00462			VWDE
cg24332305	-0.38674	0.00462			MAML3
cg26512469	-0.3866	0.00464	-0.279	0.045266	MCF2L
cg00325112	-0.38649	0.00465			TMED5
cg05844879	-0.38638	0.00467			KLRC2
cg12626882	-0.38633	0.00467			DNAH9
cg12869830	-0.3863	0.00467			POU2F3
cg02486096	-0.38613	0.00469	0.332	0.016302
cg07839457	-0.38587	0.00472			NLRC5
cg27281836	-0.38583	0.00473			FOLH1
cg06579577	-0.38582	0.00473	0.288	0.038464	ADAMTS13
cg04582010	-0.38573	0.00474	-0.318	0.021463	IFITM1
cg01985732	-0.38559	0.00476			BCAS4
cg25410233	-0.3855	0.00477			SLC35F3
cg03275306	-0.38548	0.00477	0.382	0.005258	BCL2A1
cg09455823	-0.38546	0.00477
cg05792501	-0.38537	0.00478			PALM2AKAP2
cg04053170	-0.38536	0.00478			GRID1
cg22027471	-0.38535	0.00479			SLC5A4
cg22877366	-0.38532	0.00479
cg10359480	-0.38531	0.00479	0.456	0.000689	PRDM1
cg06997272	-0.3851	0.00482	0.525	6.6e-05
cg24534756	-0.38504	0.00482	-0.392	0.00406	RBM33
cg02745912	-0.38503	0.00482
cg12720342	-0.38501	0.00483			WIPF1
cg27246335	-0.38497	0.00483	-0.293	0.034754
cg14797147	-0.38494	0.00484
cg02787452	-0.38492	0.00484			TMEM252
cg14161894	-0.38489	0.00484	-0.406	0.00282
cg21136445	-0.38477	0.00486	0.39	0.004219
cg11757444	-0.38466	0.00487			RPTOR
cg15883690	-0.38458	0.00488	0.284	0.041212
cg01034232	-0.38438	0.0049	0.578	7e-06	SDK1
cg08629796	-0.38427	0.00492			C18orf54
cg09235645	-0.38417	0.00493			CNTN4
cg20651018	-0.38409	0.00494			CARS1
cg11528086	-0.38407	0.00494	0.372	0.006689	COL13A1
cg11601398	-0.38396	0.00495
cg14578060	-0.38381	0.00497
cg26095158	-0.38373	0.00498			LYPLAL1-AS1
cg01157632	-0.38368	0.00499	0.446	0.000934	LINC00701
cg27574547	-0.38355	0.005			PHACTR3
cg19428589	-0.38354	0.005
cg18150469	-0.38351	0.00501
cg11090759	-0.38334	0.00503			HTR2A
cg20499714	-0.38314	0.00505
cg21559140	-0.38306	0.00506			ZNF365
cg09168501	-0.38282	0.00509			NTMT2
cg14147184	-0.38278	0.0051	0.339	0.014097	OLFM1
cg09485313	-0.38274	0.0051
cg21022547	-0.38264	0.00512	0.281	0.043572	GNA14
cg24325314	-0.38246	0.00514			LCE1D
cg19590421	-0.3823	0.00516
cg23684898	-0.38226	0.00516	0.288	0.038433	RBFOX3
cg26615440	-0.38225	0.00517			TMEM108
cg00982136	-0.38218	0.00518			CLK1
cg04721828	-0.38215	0.00518	0.438	0.001168	OR4X1
cg12227626	-0.38202	0.0052			MTHFD1L
cg16417977	-0.38201	0.0052			PIK3CD
cg23919844	-0.38188	0.00521			ARHGEF7
cg08363235	-0.38183	0.00522			SGMS1
cg10713839	-0.38169	0.00524
cg02654270	-0.38162	0.00525
cg08185624	-0.3816	0.00525			LINC01179
cg08548559	-0.38132	0.00529	0.284	0.041146	PIK3IP1
cg25948681	-0.38129	0.00529
cg13070650	-0.38125	0.00529			STK3
cg15276228	-0.38117	0.0053			CBLB
cg21753092	-0.38105	0.00532
cg11755585	-0.38102	0.00532
cg22149555	-0.38094	0.00533
cg21442626	-0.38084	0.00535			ATP6V1C1
cg18512645	-0.38082	0.00535
cg18260532	-0.38076	0.00536
cg13716827	-0.38068	0.00537	-0.307	0.026709
cg07368127	-0.38063	0.00538	-0.413	0.002345	KANSL1
cg26646896	-0.38054	0.00539
cg12183150	-0.38042	0.0054	-0.292	0.035868
cg14924300	-0.38042	0.0054	0.567	1.2e-05	CACNA1E
cg03087807	-0.38042	0.0054
cg19291618	-0.38027	0.00542	0.552	2.2e-05
cg06578276	-0.38018	0.00543			BAIAP2
cg17724439	-0.38013	0.00544			PRKN
cg22977055	-0.38001	0.00546
cg11472655	-0.37999	0.00546	0.583	6e-06
cg25087163	-0.37984	0.00548
cg06285291	-0.37983	0.00548	0.35	0.010868	IGSF9B
cg20086657	-0.37968	0.0055
cg14396346	-0.37965	0.0055
cg18800968	-0.37937	0.00554	-0.299	0.031453	SWAP70
cg25214376	-0.3792	0.00557
cg17707870	-0.37915	0.00557			LHFPL6
cg00060404	-0.37914	0.00557			SLC26A3
cg01338043	-0.37908	0.00558			AGFG2
cg11104311	-0.37903	0.00559			SLC35F3
cg22664298	-0.37899	0.00559	-0.411	0.002468	ADAMTS19
cg00458731	-0.37892	0.0056			SEC22A
cg09540102	-0.37882	0.00562			EME2
cg07634717	-0.37843	0.00567			RNF144A
cg24206531	-0.37836	0.00568
cg07292014	-0.37816	0.00571
cg17468656	-0.37815	0.00571			CACNA2D1
cg00297362	-0.37806	0.00572			FAM98B
cg09813647	-0.3779	0.00574			LOC100294362
cg00693253	-0.37781	0.00576			LRP1
cg21515402	-0.37778	0.00576	0.326	0.018512
cg27339271	-0.37778	0.00576
cg16681908	-0.37766	0.00578	0.336	0.014823	CACNA1B
cg19934931	-0.37758	0.00579	0.394	0.003843
cg10351829	-0.37736	0.00582	0.416	0.002139
cg05902130	-0.37734	0.00582	0.305	0.027896	SYNDIG1L
cg11881472	-0.37731	0.00583	0.565	1.3e-05	PRR5L
cg17552056	-0.37718	0.00584
cg05612984	-0.37713	0.00585			GALNTL6
cg18896979	-0.37705	0.00586	-0.277	0.046696
cg25376503	-0.37648	0.00594
cg05552307	-0.37642	0.00595			YOD1
cg00939438	-0.37621	0.00598			SAMD4A
cg21326987	-0.37599	0.00601	-0.279	0.045281	KRT72
cg25304405	-0.37599	0.00601	0.282	0.042513	ASIC2
cg26758826	-0.37594	0.00602			TENM2
cg05270224	-0.37571	0.00606
cg19856897	-0.37563	0.00607
cg21639922	-0.37559	0.00607			PDE9A
cg01603661	-0.3754	0.0061
cg24140061	-0.37539	0.0061
cg13055199	-0.37534	0.00611	0.321	0.020523	ULK3
cg14170999	-0.3753	0.00611			BAHCC1
cg19388930	-0.37526	0.00612	0.39	0.004226
cg24432193	-0.37518	0.00613			GRIK2
cg00667525	-0.37515	0.00614	-0.3	0.030623	REX1BD
cg10211118	-0.37505	0.00615			RPTOR
cg25094735	-0.375	0.00616			NAPSB
cg13759594	-0.37497	0.00616			PDZD7
cg13498005	-0.37493	0.00617	-0.409	0.002608
cg01407018	-0.37493	0.00617	0.496	0.000184
cg21292768	-0.37489	0.00618	-0.307	0.027078
cg16931068	-0.37459	0.00622	0.286	0.040014	DEFB127
cg04991179	-0.37451	0.00623	0.406	0.002818
cg17171259	-0.3744	0.00625	0.301	0.030004	ROR1
cg00807008	-0.3744	0.00625	0.321	0.020381	CLASP1
cg13396134	-0.37433	0.00626
cg11612799	-0.37424	0.00627	0.447	0.00089
cg20398969	-0.37411	0.00629			LOC284930
cg19787097	-0.37406	0.0063			RBMS3
cg14154655	-0.37401	0.00631	-0.349	0.0112
cg06147194	-0.37398	0.00631			FDXR
cg23052944	-0.37393	0.00632	0.36	0.008678	SGPL1
cg21957479	-0.37387	0.00633			KIF6
cg00055603	-0.3737	0.00635
cg16168178	-0.37367	0.00636			KLF12
cg13131015	-0.37366	0.00636			GUCY2C
cg18972971	-0.37358	0.00637
cg05424831	-0.3734	0.0064			ATXN7L1
cg15036867	-0.37324	0.00642
cg23570810	-0.37303	0.00646			IFITM1
cg11283152	-0.37303	0.00646			RHOBTB1
cg24073384	-0.37292	0.00647	0.374	0.006345	PTPN3
cg18768136	-0.37292	0.00647			SGMS1
cg01394772	-0.37284	0.00649
cg06800231	-0.37283	0.00649	0.646	0	LINC00596
cg03979311	-0.37279	0.00649			GZMK
cg10726445	-0.37274	0.0065			LMO7
cg18479329	-0.37271	0.00651	-0.302	0.029316
cg13920278	-0.37262	0.00652
cg26852404	-0.37261	0.00652
cg05108508	-0.37259	0.00652	0.37	0.007014	GGACT
cg16375131	-0.37255	0.00653	0.322	0.020104	TVP23B
cg07855931	-0.37252	0.00654			ADAMTS9
cg27571561	-0.37246	0.00654
cg02988816	-0.37243	0.00655	-0.366	0.007568	CSGALNACT1
cg17227774	-0.37236	0.00656			BAIAP2
cg08613765	-0.37235	0.00656
cg04629955	-0.37232	0.00657
cg00436969	-0.37227	0.00658			RESP18
cg19364765	-0.37219	0.00659	-0.291	0.036664	LINC01111
cg26664556	-0.37209	0.0066
cg24080129	-0.37208	0.00661	0.296	0.033252	TAP2
cg21659295	-0.37205	0.00661
cg01296553	-0.37196	0.00662			IFI16
cg07225509	-0.37182	0.00665			GALNT10
cg05140433	-0.37181	0.00665	0.278	0.046374	TUB
cg10678513	-0.37155	0.00669			PHACTR3
cg24114019	-0.37153	0.00669
cg17944326	-0.37139	0.00671			PTPRN2
cg19298573	-0.37138	0.00671	0.478	0.000337	NTM
cg06725339	-0.37136	0.00672			PGA3
cg21005683	-0.37133	0.00672	-0.297	0.03245
cg02803727	-0.37124	0.00674
cg02048922	-0.37118	0.00675			ADGRB1
cg08757924	-0.37111	0.00676
cg10506445	-0.371	0.00678			NR5A2
cg08055338	-0.37073	0.00682
cg17364368	-0.37057	0.00685	-0.37	0.00691
cg03738438	-0.37049	0.00686	0.368	0.007275	SPSB1
cg03813904	-0.37042	0.00687	-0.394	0.003825	LRRN1
cg21516550	-0.37034	0.00688	0.408	0.002652
cg26785303	-0.3702	0.00691
cg19300401	-0.37008	0.00693
cg27187580	-0.36986	0.00696
cg04821052	-0.36968	0.00699	0.493	0.000205	TNR
cg02870602	-0.36955	0.00701			SAMD12-AS1
cg09626521	-0.36953	0.00702
cg16368519	-0.36947	0.00703			SUN1
cg03713658	-0.36941	0.00704
cg02441383	-0.36936	0.00704			NEK10
cg09096219	-0.3691	0.00709	-0.432	0.001375
cg06655863	-0.36892	0.00712
cg07951728	-0.36887	0.00713
cg07170252	-0.36867	0.00716			ESRRB
cg13727946	-0.36863	0.00717	0.421	0.0019	MBD3L1
cg13905981	-0.36862	0.00717	-0.422	0.001848
cg26465155	-0.36832	0.00722
cg22541598	-0.36817	0.00724
cg24808105	-0.36807	0.00726
cg20017856	-0.36789	0.00729	0.542	3.4e-05	MIR548AI
cg08217354	-0.36789	0.00729			C1QTNF7
cg26408837	-0.36787	0.0073	0.344	0.012492	RBFOX3
cg22865550	-0.36785	0.0073
cg14928378	-0.3678	0.00731
cg05941376	-0.36778	0.00731			WWC1
cg10094930	-0.36776	0.00731			AACSP1
cg11943505	-0.36768	0.00733	0.521	7.4e-05
cg14767338	-0.36761	0.00734	-0.274	0.049493	PRDM16
cg04377740	-0.36751	0.00736
cg12241552	-0.36727	0.0074			TM4SF19-AS1
cg24589268	-0.36723	0.0074	-0.494	0.000195
cg12939025	-0.36716	0.00742
cg23208443	-0.36706	0.00744	-0.351	0.010833	ABLIM2
cg07724487	-0.36705	0.00744			ZNF418
cg11503396	-0.3669	0.00746
cg09998482	-0.36686	0.00747			ALMS1
cg26657312	-0.36684	0.00747	-0.291	0.03605
cg20676788	-0.36683	0.00747	0.445	0.000948
cg02933942	-0.36683	0.00748
cg23286346	-0.36661	0.00751	0.332	0.016194
cg02975187	-0.36659	0.00752	0.282	0.043143	FLJ41941
cg22079534	-0.36659	0.00752	0.424	0.001736
cg01598596	-0.36658	0.00752			BCL6
cg17341821	-0.36657	0.00752
cg18651858	-0.36655	0.00753			BRSK2
cg15241074	-0.36647	0.00754			TRIB2
cg12131894	-0.36634	0.00756			MORN1
cg04073914	-0.36631	0.00757			LPCAT1
cg04610742	-0.36622	0.00758			PGBD5
cg02377704	-0.36615	0.00759			KRT1
cg19459049	-0.36613	0.0076	-0.426	0.001617
cg16726325	-0.36612	0.0076	-0.491	0.000223
cg09156987	-0.36608	0.00761
cg03324695	-0.36606	0.00761
cg07499182	-0.3659	0.00764			STARD13
cg18100580	-0.36587	0.00765
cg04573632	-0.36585	0.00765
cg04123836	-0.36583	0.00765			TRAM2
cg12788111	-0.36578	0.00766	0.496	0.000183	RNF111
cg11706129	-0.36571	0.00767
cg12981577	-0.36568	0.00768
cg04403371	-0.36564	0.00769
cg03905369	-0.36561	0.00769			EPB41L5
cg12508651	-0.36545	0.00772	-0.276	0.047972	PTCHD3
cg01363565	-0.36543	0.00772			LINC00616
cg08790576	-0.36538	0.00773	0.278	0.045845
cg05235844	-0.36527	0.00775			ACTL7A
cg08968773	-0.36526	0.00775	0.47	0.000433
cg04963199	-0.36521	0.00776			SLC7A5
cg21937481	-0.36509	0.00779
cg01406203	-0.365	0.0078			LCE1D
cg23043514	-0.36492	0.00782	-0.435	0.001278
cg23325796	-0.3648	0.00784	0.399	0.003427
cg07583744	-0.36458	0.00788	0.442	0.001037	AUTS2
cg08673419	-0.36442	0.00791
cg02421646	-0.36441	0.00791	0.28	0.04457	MS4A6A
cg17360125	-0.36425	0.00794			LAMB1
cg13367856	-0.36422	0.00794			HERPUD2
cg00842000	-0.36418	0.00795	0.627	1e-06
cg13332953	-0.36402	0.00798			DKK3
cg24739157	-0.364	0.00798
cg13164537	-0.36394	0.008	0.479	0.000325	CD226
cg16858587	-0.36381	0.00802	-0.41	0.002562	SCN5A
cg14839649	-0.3638	0.00802
cg17560267	-0.36378	0.00803
cg10470891	-0.36376	0.00803
cg04855034	-0.36373	0.00803	0.355	0.009736
cg16755235	-0.36366	0.00805			NSMAF
cg26031613	-0.36361	0.00806			KLC1
cg11795015	-0.36361	0.00806
cg06881666	-0.36346	0.00809
cg12217308	-0.36342	0.00809			PRKN
cg24400465	-0.3633	0.00812	-0.378	0.005769	APBB1IP
cg08419061	-0.3632	0.00813	-0.282	0.042889	LINC01515
cg14509777	-0.36306	0.00816			UROC1
cg04184257	-0.36268	0.00823			SPIDR
cg22861256	-0.36255	0.00826
cg00159953	-0.36253	0.00826			COL6A2
cg27507473	-0.36242	0.00828	0.29	0.036808
cg22395761	-0.36241	0.00828	-0.528	5.8e-05	CD27
cg16144436	-0.36234	0.0083	0.359	0.008948	DNAH2
cg26209676	-0.36234	0.0083			ZNF580
cg00554616	-0.36223	0.00832
cg03784258	-0.36222	0.00832	0.347	0.011822
cg01871722	-0.36206	0.00835	-0.353	0.01028	RESF1
cg03168615	-0.36205	0.00835			GNG12-AS1
cg16846514	-0.36204	0.00835	-0.318	0.021588
cg00154543	-0.36204	0.00835	0.731	0
cg22984586	-0.36194	0.00837			CCR5
cg06619035	-0.36172	0.00842	-0.312	0.024505	CNOT10
cg12684958	-0.36171	0.00842			PPBPP2
cg24298759	-0.36165	0.00843
cg23460353	-0.3615	0.00846			OR4L1
cg15885288	-0.36136	0.00849	0.382	0.005178
cg11646124	-0.36133	0.00849
cg11137145	-0.36117	0.00852			KPRP
cg13133526	-0.36113	0.00853			ZDHHC14
cg26824678	-0.36108	0.00854			CAPZB
cg08317907	-0.36101	0.00855	0.596	3e-06
cg04781339	-0.36084	0.00859
cg25676572	-0.36078	0.0086
cg18146226	-0.36068	0.00862			BCL6
cg16686458	-0.36068	0.00862			KLHL21
cg21346425	-0.36066	0.00862	0.484	0.000277	ANKRD34C
cg26379759	-0.36065	0.00863			FMN2
cg03871489	-0.36063	0.00863	-0.368	0.007207	SEMA4D
cg24429533	-0.36061	0.00863	0.436	0.001231	NRCAM
cg23198935	-0.36058	0.00864			PCDH15
cg12154943	-0.36051	0.00865	0.325	0.018859
cg06601098	-0.3605	0.00866
cg00100375	-0.36049	0.00866			TENM2
cg13998728	-0.36042	0.00867			MYO3B
cg20553985	-0.36018	0.00872
cg16071219	-0.35995	0.00877			LPAR6
cg27024127	-0.3599	0.00878			SCARA3
cg06000233	-0.35986	0.00878	-0.574	8e-06	SCEL
cg13763524	-0.35973	0.00881
cg13033202	-0.3597	0.00882			PTPN14
cg02567454	-0.35952	0.00885			RGS12
cg15923359	-0.35944	0.00887			CSGALNACT1
cg00393487	-0.35937	0.00888			RTP1
cg09204255	-0.35929	0.0089	0.309	0.025604	DNAAF3
cg23734194	-0.35919	0.00892			LINC00578
cg14064268	-0.35891	0.00898			BRSK2
cg12988522	-0.3589	0.00898	-0.49	0.000226	SHMT2
cg15923943	-0.35887	0.00899			PCDHA1
cg04883202	-0.35886	0.00899			PTPRD
cg00124902	-0.35885	0.00899			C1orf94
cg11912991	-0.35884	0.00899	0.284	0.041633	KCNJ6
cg09939854	-0.35879	0.009			GRID1
cg26445985	-0.35876	0.00901			DENND2A
cg09456260	-0.35875	0.00901
cg01930713	-0.35865	0.00903	0.28	0.044452	LOXL1
cg11058623	-0.35863	0.00904	0.519	8.1e-05
cg06824156	-0.35861	0.00904	0.411	0.00249	LOXL2
cg09730955	-0.3586	0.00904
cg23596287	-0.35853	0.00906
cg15108060	-0.35849	0.00906			RB1
cg07890553	-0.35846	0.00907	0.36	0.00876	TMEM39A
cg04532989	-0.35844	0.00907			ARFGAP2
cg05880641	-0.35841	0.00908
cg06634917	-0.35837	0.00909
cg20142682	-0.35823	0.00912
cg00977403	-0.35815	0.00913			IFT140
cg26765430	-0.35803	0.00916			SNAP47
cg01124297	-0.35803	0.00916			THADA
cg00621679	-0.35788	0.00919	-0.317	0.022086	MEGF11
cg25060738	-0.35775	0.00922			SCML4
cg27086900	-0.3577	0.00923
cg13426610	-0.35767	0.00924			XXYLT1
cg08261681	-0.35767	0.00923
cg10085039	-0.35765	0.00924	0.288	0.03809
cg17395311	-0.35762	0.00925			MKLN1
cg04362419	-0.35761	0.00925			CEP70
cg15594605	-0.35746	0.00928			SORCS2
cg19584733	-0.35715	0.00934			DENND4C
cg22849865	-0.35712	0.00935	0.533	4.7e-05
cg02869783	-0.35708	0.00936
cg11177526	-0.35707	0.00936			PYHIN1
cg04601775	-0.35706	0.00936			HLA-DRB1
cg04878349	-0.35704	0.00937			DCLK3
cg13036173	-0.35701	0.00937			ATXN2
cg11067552	-0.3569	0.0094	0.28	0.044005
cg24212267	-0.35684	0.00941	0.278	0.046331	AKR1D1
cg26148285	-0.35683	0.00941			LOC254896
cg13360848	-0.35681	0.00942	0.372	0.006661	EFNA5
cg08280512	-0.35668	0.00945			AFAP1L2
cg07936689	-0.35663	0.00946			DISP3
cg08079330	-0.3566	0.00946	0.507	0.000125	ESRRB
cg11657520	-0.35655	0.00947			PDK1
cg11040518	-0.35652	0.00948
cg21871091	-0.35651	0.00948			HLCS
cg26893861	-0.35644	0.0095			DUSP3
cg14597598	-0.35643	0.0095			NRG1
cg04733856	-0.35632	0.00952
cg00615033	-0.35628	0.00953			COLEC12
cg17161099	-0.35602	0.00959			BACH2
cg01894614	-0.35594	0.0096	0.318	0.021756	CD226
cg16823698	-0.3556	0.00968			SGMS1
cg05181342	-0.35551	0.0097
cg24658548	-0.35538	0.00973			SMAP2
cg15591384	-0.35531	0.00974			HLA-DRB6
cg07838857	-0.35516	0.00978
cg25756180	-0.35509	0.00979			LOC100996679
cg01479190	-0.35506	0.0098	0.283	0.042325
cg11425845	-0.35506	0.0098	0.333	0.015975
cg01660630	-0.35505	0.0098			BRSK2
cg23701396	-0.35503	0.0098			SOBP
cg24317478	-0.35501	0.00981			CFAP77
cg03407524	-0.35492	0.00983	-0.283	0.042235	FASN
cg14097152	-0.35492	0.00983
cg11669208	-0.35479	0.00986
cg01010073	-0.35461	0.0099			CCM2
cg17707095	-0.3546	0.0099			RPS6KA2
cg06612196	-0.35455	0.00991
cg09121569	-0.35421	0.00999
cg00661424	-0.35382	0.01008
cg12693181	-0.35382	0.01008
cg13588888	-0.35375	0.01009
cg02103362	-0.35374	0.01009			NPHP4
cg10541936	-0.3537	0.0101
cg02675621	-0.35366	0.01011
cg07166784	-0.35359	0.01013			CORT
cg03664790	-0.3535	0.01015
cg13435526	-0.35345	0.01016	0.278	0.046223	CCAR2
cg08527799	-0.35343	0.01016
cg13843573	-0.35328	0.0102			SCN8A
cg25172338	-0.35317	0.01022	0.389	0.004323	KLHDC7A
cg03604774	-0.35315	0.01023
cg01361555	-0.35299	0.01026			SOS1
cg17367495	-0.35293	0.01028	0.292	0.035509	ACSL1
cg18476566	-0.35291	0.01028	0.291	0.036145	OR4K14
cg15897921	-0.35283	0.0103			C1orf112
cg25172968	-0.35281	0.01031	0.287	0.039339	SPEM2
cg04415014	-0.35278	0.01031			C1D
cg17069872	-0.35277	0.01031			THEMIS
cg07911664	-0.35272	0.01033
cg00862398	-0.35269	0.01033			NECTIN4
cg15979214	-0.35265	0.01034			TRIM10
cg02843684	-0.35263	0.01035			PLOD2
cg12422484	-0.35259	0.01036			PAG1
cg04060288	-0.35241	0.0104			SNORD113-9
cg13542633	-0.35228	0.01043
cg03501899	-0.35215	0.01046
cg07979579	-0.35213	0.01046			SPRYD7
cg27431761	-0.35188	0.01052
cg06737308	-0.35169	0.01057			ENPP6
cg12150097	-0.35168	0.01057	0.385	0.004792
cg01412037	-0.35146	0.01062	-0.299	0.031491
cg23386236	-0.35141	0.01063			CAPN3
cg00236601	-0.35135	0.01065	0.292	0.035971
cg02393640	-0.35124	0.01067			LUZP6
cg19920417	-0.35118	0.01069	0.464	0.000526	SYNJ2
cg11280732	-0.35115	0.0107
cg05668703	-0.35103	0.01072			BAHCC1
cg03547881	-0.35089	0.01076	0.341	0.013224	CHPF2
cg19616624	-0.35088	0.01076			SIRPG
cg24192933	-0.35087	0.01076	0.44	0.001112	PCDHB1
cg24587835	-0.35069	0.01081			LOC339166
cg04620750	-0.35057	0.01083
cg12387754	-0.35048	0.01086			LDLRAD3
cg11499748	-0.3504	0.01088			AGXT2
cg26444471	-0.35037	0.01088	0.378	0.005687	EPHA8
cg00850175	-0.35019	0.01093			IMMP2L
cg11597418	-0.35012	0.01094			POU2F3
cg06074252	-0.35001	0.01097
cg15251748	-0.34992	0.01099			TRIL
cg22459517	-0.34987	0.011			EPS8L1
cg07441878	-0.34983	0.01102
cg14422334	-0.34977	0.01103
cg02458997	-0.34976	0.01103			ABLIM2
cg08239440	-0.34967	0.01105
cg14611816	-0.34965	0.01106			BAIAP2
cg02910018	-0.34954	0.01109			TMTC1
cg22202600	-0.34925	0.01116	0.296	0.0334
cg12267558	-0.34915	0.01118	0.471	0.00043
cg18929835	-0.34908	0.0112			STK4
cg02775404	-0.34905	0.01121
cg12102398	-0.34888	0.01125
cg14060113	-0.34863	0.01131			CCDC124
cg07003881	-0.34862	0.01131	-0.535	4.3e-05
cg11070274	-0.34859	0.01132
cg12334759	-0.34856	0.01133			ODF3L2
cg07513392	-0.34826	0.01141			STK32C
cg01827191	-0.34825	0.01141
cg23385492	-0.34813	0.01144	0.356	0.009537	PTPRN2
cg27145165	-0.34811	0.01144			GLRA3
cg22083892	-0.34809	0.01145			KCNJ8
cg21318071	-0.34798	0.01148
cg16449620	-0.34793	0.01149
cg17571733	-0.34792	0.01149	-0.308	0.026225	PTK2
cg11437296	-0.34792	0.01149	0.383	0.005012	OVCH1-AS1
cg03066009	-0.34789	0.0115			CYP7B1
cg21542345	-0.34789	0.0115
cg03321719	-0.34786	0.01151	0.356	0.009489
cg02573091	-0.34782	0.01152
cg27547993	-0.34761	0.01157	0.292	0.035555
cg00892703	-0.34761	0.01157			CPNE7
cg07728373	-0.3476	0.01157
cg00267207	-0.34746	0.01161			GUCY2C
cg27133780	-0.34737	0.01163			CMTM7
cg08340482	-0.34735	0.01164			PTH2
cg07445365	-0.34712	0.0117			STK32C
cg08528035	-0.34703	0.01172
cg24299087	-0.34697	0.01173	-0.326	0.018508	TBXT
cg04646573	-0.34682	0.01177			S100A7A
cg10877234	-0.34681	0.01178	0.36	0.008691
cg03083228	-0.34677	0.01179
cg17359622	-0.34676	0.01179			NUDT7
cg14877834	-0.34665	0.01182
cg08973672	-0.34661	0.01183
cg19492997	-0.34659	0.01183
cg09908042	-0.34656	0.01184			PCSK6
cg15774458	-0.34641	0.01188			NPTN
cg06482498	-0.34629	0.01191			SNORD48
cg19556123	-0.34626	0.01192	-0.436	0.00124	ZNF365
cg08470013	-0.34626	0.01192	-0.376	0.006024	OR5AC2
cg17898762	-0.34623	0.01193	-0.304	0.028409
cg17454318	-0.34619	0.01194			ADRA1A
cg17143291	-0.34615	0.01195			CACNA1E
cg20930548	-0.34605	0.01197	0.369	0.007083
cg00966522	-0.34605	0.01197
cg08460026	-0.34604	0.01198			CTLA4
cg11801851	-0.34603	0.01198	0.297	0.032401	ADAMTS4
cg03040423	-0.346	0.01199	-0.32	0.020622	DNAJC8
cg01901290	-0.346	0.01199			FAM110A
cg01967537	-0.34577	0.01205
cg21856784	-0.34567	0.01207			TRIM15
cg23794184	-0.3456	0.01209	-0.362	0.008378	SIRPG
cg17337463	-0.34554	0.01211	-0.303	0.028915	RAP1A
cg05871907	-0.34536	0.01216	0.276	0.047885	PARD3
cg00677287	-0.34531	0.01217			KCNH7
cg17790358	-0.34523	0.01219			HTR1E
cg26271001	-0.34513	0.01222	-0.457	0.000663
cg24697097	-0.34507	0.01223
cg19777664	-0.34498	0.01226	0.36	0.008779	LMX1A
cg00982519	-0.34496	0.01226			SFTA1P
cg19074170	-0.34493	0.01227	0.474	0.000389	CNTNAP5
cg02252289	-0.34487	0.01229			AGAP1
cg18796711	-0.34482	0.0123
cg15852849	-0.34478	0.01231
cg04365102	-0.34469	0.01234	0.275	0.048474	RAMP1
cg03127141	-0.34467	0.01234	0.285	0.040857	ANKRD17
cg14059543	-0.34458	0.01236
cg10590925	-0.34456	0.01237			BRSK2
cg11847618	-0.34452	0.01238
cg23084528	-0.34451	0.01239			HSD17B7P2
cg00807366	-0.34447	0.0124			MSMB
cg08742502	-0.34438	0.01242	0.511	0.000108	PRDM1
cg03427849	-0.34433	0.01243	-0.341	0.013508	TRAPPC11
cg10679346	-0.34433	0.01243	-0.313	0.023821
cg24169771	-0.34423	0.01246			VIT
cg15352782	-0.34414	0.01249			PPP2R5C
cg11532477	-0.34404	0.01251	0.356	0.009551
cg24654028	-0.34404	0.01251			DENND2B
cg15498409	-0.34391	0.01255
cg01801603	-0.34388	0.01256			ZHX2
cg21269859	-0.3438	0.01258			SCG2
cg01908026	-0.34379	0.01258
cg22936981	-0.3436	0.01263	-0.321	0.020219	PGM1
cg25858657	-0.34357	0.01264	0.359	0.008874
cg24035363	-0.34343	0.01268			GGNBP2
cg13898384	-0.34341	0.01269	0.296	0.03325	ZNF106
cg27153751	-0.34341	0.01269
cg14227618	-0.34339	0.01269
cg25184502	-0.34323	0.01274
cg06683719	-0.34312	0.01277
cg27637949	-0.34306	0.01278	0.29	0.036697	TNFAIP2
cg18837378	-0.34302	0.01279	0.309	0.025842	RELN	Expression reduced in the brains of SCZ patients. Variants are rare and epigenetic mechanisms are a more likely way of action (review in Guidotti et al., Front. Cell. Neurosci. 2016)
cg08370040	-0.34298	0.0128
cg21441526	-0.34295	0.01281			LAMA3
cg25666278	-0.34293	0.01282	-0.617	1e-06	ITGAE
cg23916780	-0.34292	0.01282	0.313	0.023783	FOXN2
cg16231923	-0.34288	0.01283			NPTN
cg10937372	-0.34284	0.01284	0.455	0.000705
cg01141708	-0.34275	0.01287			TARP
cg11822515	-0.3427	0.01288	0.303	0.028939
cg17706093	-0.3424	0.01297	0.309	0.02564
cg22643760	-0.34234	0.01298
cg05381178	-0.34232	0.01299	0.298	0.032034
cg11036886	-0.3423	0.013	0.389	0.00438
cg05836043	-0.34224	0.01301	0.284	0.04114	LAMA1
cg23518302	-0.34219	0.01303
cg27276993	-0.34213	0.01304	0.346	0.011998
cg19287610	-0.34211	0.01305	0.371	0.006761
cg26563723	-0.34207	0.01306			ASB5
cg21462914	-0.34203	0.01307
cg11857805	-0.34181	0.01314
cg00689685	-0.34169	0.01317			AGPAT1
cg03861379	-0.34165	0.01318
cg25496760	-0.34164	0.01318			CLEC16A
cg06944758	-0.34156	0.01321	0.38	0.005417
cg05393023	-0.34129	0.01328	0.479	0.000332	SFT2D2
cg08249133	-0.34129	0.01328			LOC100287944
cg14409029	-0.34129	0.01328			ZDHHC13
cg14957731	-0.34128	0.01329			KRTAP3-1
cg23947654	-0.34128	0.01329			TANC1
cg12290615	-0.34127	0.01329	-0.617	1e-06	SMAP1
cg20114524	-0.34127	0.01329			MUCL3
cg05237259	-0.34126	0.01329			PAMR1
cg21279924	-0.3412	0.01331			GRM8
cg00006771	-0.34119	0.01331	0.327	0.017904	UBASH3B
cg22856203	-0.34116	0.01332			SCHLAP1
cg11389871	-0.34108	0.01334
cg01292539	-0.34108	0.01334
cg12459000	-0.341	0.01337			KIF17
cg08790320	-0.34095	0.01338			ITGBL1
cg03140067	-0.34092	0.01339
cg26085633	-0.34088	0.0134	-0.414	0.002282	CACNA1D
cg17429870	-0.34079	0.01343			BRSK2
cg15576188	-0.34079	0.01343			YLPM1
cg09730272	-0.34062	0.01348
cg23778370	-0.34061	0.01348			RAMP3
cg27104695	-0.34058	0.01349			SH3BP5
cg21549285	-0.34054	0.0135			MX1
cg09543047	-0.34046	0.01352
cg06763192	-0.34041	0.01354			NXN
cg10850353	-0.34039	0.01354	0.303	0.028867
cg01022117	-0.34028	0.01357			PKP1
cg12651029	-0.34023	0.01359			RPS6KA5
cg08577913	-0.34014	0.01362			TRIM21
cg20868901	-0.3401	0.01363
cg08624695	-0.34008	0.01363			UNC5C
cg02920081	-0.34006	0.01364
cg01810907	-0.34005	0.01364	-0.444	0.000969	GNG12
cg04146137	-0.33984	0.0137	-0.465	0.000521	MTF1
cg17988640	-0.33964	0.01377	0.366	0.00755	CHRNB1
cg08563032	-0.33958	0.01378
cg04124057	-0.33954	0.01379
cg04228235	-0.33952	0.0138	0.334	0.01561	PTPRN2
cg05719818	-0.33948	0.01381	0.322	0.020033	ABLIM2
cg03754428	-0.33947	0.01382			NLRC5
cg13585612	-0.33943	0.01383	0.341	0.013307
cg06762457	-0.3394	0.01384	0.458	0.000636	ZC3H12D
cg17837517	-0.33939	0.01384
cg16192774	-0.33932	0.01386			HMGN2P46
cg00082912	-0.3391	0.01393
cg06293782	-0.33908	0.01393			HLA-DQA2
cg13173270	-0.33889	0.01399
cg03691722	-0.33873	0.01404	0.334	0.015473	LAMA1
cg06707825	-0.33865	0.01406	0.299	0.031223
cg00334532	-0.33857	0.01409			HLA-DQA2
cg25010115	-0.33851	0.0141			MYADML2
cg11658065	-0.33848	0.01411			SOX2-OT
cg21785034	-0.33831	0.01416
cg23880078	-0.33825	0.01418	0.531	5e-05	AZGP1
cg22917346	-0.33824	0.01418	-0.336	0.014733	CCDC122
cg16997920	-0.33815	0.01421			SPARCL1
cg04940002	-0.33804	0.01425	0.302	0.029705	GRIN2A	Some variants associated with earlier SCZ onset and therefore worse prognosis in Russian and Siberian populations (Poltavskaya et al. Life 2021)
cg22715398	-0.338	0.01426			FAM214A
cg06461266	-0.33782	0.01431	0.377	0.005856
cg24105096	-0.33774	0.01434
cg26046329	-0.33772	0.01434
cg05874523	-0.33771	0.01435	-0.293	0.034874
cg14935948	-0.3377	0.01435
cg13614103	-0.3377	0.01435
cg16576930	-0.33763	0.01437
cg14272287	-0.33759	0.01438	0.329	0.017261	LINC01570
cg04204897	-0.33754	0.0144
cg02173328	-0.33751	0.01441			SYNDIG1L
cg00944873	-0.33747	0.01442			KIAA0319
cg22461637	-0.33735	0.01446	-0.452	0.000777	PTEN
cg01807094	-0.33716	0.01452	0.344	0.012408	UBXN11
cg11269159	-0.3371	0.01453
cg01394167	-0.33707	0.01454
cg15468746	-0.33698	0.01457			RDH12
cg26276964	-0.33684	0.01462			CSMD1
cg08857688	-0.33673	0.01465			RSU1
cg16969615	-0.33667	0.01467
cg19130500	-0.33665	0.01468	0.362	0.008403	GTF2IRD1P1
cg12628550	-0.33665	0.01468			CCDC88C
cg25592907	-0.3366	0.01469			DNAJB13
cg19512737	-0.33651	0.01472			STK10
cg05452174	-0.33649	0.01473	0.348	0.011536
cg02255829	-0.33627	0.0148			XXYLT1
cg13084372	-0.33627	0.01479
cg04984024	-0.33605	0.01487			LINCR-0002
cg06670672	-0.33601	0.01488
cg07178458	-0.33582	0.01494			SLC7A5
cg02748479	-0.33577	0.01495			SHISA9
cg03328727	-0.33563	0.015			SEMA4D
cg27180005	-0.33556	0.01502
cg01380346	-0.33544	0.01506			ELL
cg15886307	-0.33537	0.01508			CIT
cg16450677	-0.33536	0.01508
cg22185661	-0.33517	0.01515			CEACAM22P
cg17548413	-0.33515	0.01515	0.356	0.009682
cg24797508	-0.33508	0.01517			PIK3R1
cg02681497	-0.33506	0.01518	0.282	0.042547	WDPCP
cg24325189	-0.33504	0.01519	-0.41	0.002528
cg20750058	-0.33493	0.01522
cg19091981	-0.33481	0.01526			HSP90AB1
cg07738730	-0.33481	0.01526			IGF2BP1
cg12214617	-0.33477	0.01527			ARHGEF1
cg17906851	-0.33476	0.01528			RPTOR
cg13046221	-0.33468	0.0153
cg16173847	-0.33464	0.01532
cg14615914	-0.33464	0.01531
cg26550485	-0.33462	0.01532
cg14516287	-0.33457	0.01534	0.537	4e-05	ASTN2	Gene involved in neuronal functioning, CNVs associated with SCZ (Vrijenhoek et al., Am J Hum Genet 2008)
cg02841199	-0.33448	0.01537			LCA5
cg23209941	-0.33446	0.01537	-0.354	0.009959	DISC1	Involved in dopaminergic system, polymorphisms related to psychiatric disorders including SCZ, potential target for treatment (review in Dahoun et al., Transl Psychiatry 2017)
cg25993865	-0.33445	0.01538			SYN3
cg02733865	-0.33445	0.01538
cg15413849	-0.33435	0.01541			CUL4A
cg06699671	-0.33435	0.01541
cg01651915	-0.33434	0.01541
cg01350803	-0.3342	0.01546
cg02784513	-0.33419	0.01546			PPP3R1
cg11758280	-0.33416	0.01547			PLCB4
cg08096656	-0.33414	0.01548	-0.277	0.04675
cg11978968	-0.33413	0.01548			LOC101927907
cg17394535	-0.3339	0.01556	0.373	0.006471	PITPNM3
cg20671150	-0.33386	0.01557			NOTCH4
cg13427045	-0.33385	0.01557
cg27634408	-0.33379	0.01559	0.356	0.009633
cg05135521	-0.33378	0.0156			RBMS1
cg09244200	-0.33376	0.0156	0.466	0.000501	SLC5A4
cg07622474	-0.33363	0.01565			GCSAML
cg09046316	-0.33361	0.01565			LOC101928973
cg14970550	-0.33358	0.01566			FBXO39
cg25952596	-0.3335	0.01569
cg23999457	-0.33346	0.0157			SYNPR
cg21165219	-0.33338	0.01573			PIEZO2
cg14832378	-0.33334	0.01574
cg12299115	-0.33332	0.01575
cg10576238	-0.33331	0.01575
cg05041110	-0.3333	0.01575			THEG5
cg02925615	-0.33325	0.01577	-0.288	0.038475
cg16817435	-0.33324	0.01577
cg04396998	-0.33306	0.01584			PPP1R15A
cg22572277	-0.33306	0.01583			PTPN3
cg09066676	-0.333	0.01586			MIR662
cg20910361	-0.33285	0.01591			RNF150
cg03885735	-0.33283	0.01591	-0.339	0.014069	ZNF365
cg24415443	-0.33276	0.01594
cg25021530	-0.33273	0.01595	0.318	0.0217	FGF10
cg05779068	-0.33272	0.01595			OR2W1
cg05655457	-0.33261	0.01599			OR5B17
cg17585528	-0.33249	0.01603			LPP
cg19841864	-0.33245	0.01604			BRIP1
cg00075986	-0.33245	0.01604
cg16320958	-0.33233	0.01608			SLC6A17
cg09443777	-0.33227	0.0161
cg15139153	-0.33214	0.01615			RNGTT
cg17553881	-0.3319	0.01623			EXOC3
cg25432642	-0.33184	0.01625
cg02549139	-0.33182	0.01626
cg06330042	-0.33171	0.01629
cg26646249	-0.3317	0.0163			DNAH5
cg13831575	-0.33162	0.01632	-0.295	0.033586	FBN1
cg00441209	-0.3315	0.01637			OR51A4
cg27095915	-0.33144	0.01638			GMDS
cg18298368	-0.33142	0.01639	0.478	0.000343
cg23716457	-0.33138	0.0164
cg17566946	-0.33133	0.01642
cg03660085	-0.33119	0.01647
cg01050736	-0.33115	0.01649			HLA-DQA2
cg12321379	-0.33111	0.0165
cg03781663	-0.33109	0.01651			AHNAK
cg17729941	-0.33109	0.01651			S100A13
cg00716704	-0.33097	0.01655
cg19884937	-0.33094	0.01656
cg03424554	-0.33087	0.01658			WWP2
cg06621027	-0.33086	0.01659			CTNNA2
cg17108253	-0.33064	0.01666
cg01536998	-0.33052	0.0167
cg08202470	-0.33045	0.01673			TBC1D22A
cg04904276	-0.33044	0.01673			TXNDC11
cg07391417	-0.33043	0.01674
cg15509430	-0.33032	0.01677	0.456	0.000685	CRISP2
cg17081805	-0.33029	0.01679	0.307	0.027094	CST13P
cg06097079	-0.33027	0.01679			CHRND
cg24982343	-0.33027	0.01679			OR10T2
cg20516279	-0.33025	0.0168	0.375	0.006155
cg00886875	-0.3302	0.01682
cg06922212	-0.33015	0.01683
cg07166908	-0.33014	0.01684
cg25199292	-0.33007	0.01686	0.63	1e-06
cg04277125	-0.33003	0.01688
cg20359349	-0.32996	0.0169	0.411	0.00248	FAM215A
cg08293909	-0.32995	0.0169	0.418	0.002067
cg01600516	-0.32994	0.01691			ALOX12
cg05024003	-0.32991	0.01692			RAMP1
cg11303839	-0.32969	0.017			CCL26
cg22337620	-0.32965	0.01701	0.303	0.0288	DLGAP1
cg15936385	-0.32961	0.01702	-0.34	0.0136	CD81
cg09169455	-0.3296	0.01703			MYO10
cg07813322	-0.32957	0.01704			OPRM1
cg20801341	-0.32934	0.01712			ARHGAP5
cg23683899	-0.32929	0.01714	0.312	0.024242	EHMT1
cg01076129	-0.32923	0.01716	0.418	0.002048	CRISP2
cg18462242	-0.32923	0.01716
cg11525020	-0.32916	0.01719			BANF2
cg06420764	-0.32907	0.01722			APLNR
cg08799069	-0.32899	0.01724	-0.505	0.000134	EEF1AKMT2
cg16827215	-0.32898	0.01725			GALNT18
cg04996388	-0.32889	0.01728			MYADML2
cg07355000	-0.32878	0.01732
cg16810310	-0.32877	0.01732			BRMS1
cg20071413	-0.32876	0.01733
cg24675775	-0.32873	0.01734			LOC101928580
cg20904503	-0.32855	0.01741			JPH1
cg09538287	-0.32849	0.01743			CTNNA3
cg10675363	-0.32841	0.01746			NFKBIA
cg21547204	-0.32823	0.01752			ARHGAP24
cg13228576	-0.3282	0.01753	0.485	0.000271	ASB18
cg04775856	-0.32818	0.01754			COL4A2
cg15178138	-0.32816	0.01755			SORCS2
cg04554918	-0.32815	0.01755
cg01604027	-0.32786	0.01766	0.364	0.007985	PPFIA2
cg13761596	-0.32784	0.01766
cg03926784	-0.32768	0.01772	0.286	0.039999	TAGLN2
cg12012941	-0.32751	0.01778
cg07925921	-0.32745	0.01781			MYH14
cg12920851	-0.32736	0.01784
cg19018844	-0.32735	0.01784	0.519	8.2e-05	DIP2C
cg22644372	-0.32726	0.01788
cg24604310	-0.32725	0.01788	0.509	0.000115
cg16588769	-0.32724	0.01789	0.382	0.005177	SPATA16
cg18688062	-0.32721	0.0179			PSORS1C3
cg12044284	-0.3271	0.01794	0.448	0.000862
cg13388618	-0.3271	0.01794			RAMP1
cg13248811	-0.32704	0.01796			SOD3
cg22525895	-0.327	0.01797			MIR29B2
cg02207534	-0.32693	0.018	0.367	0.007496
cg23900144	-0.32692	0.018
cg23785612	-0.32692	0.018
cg14417784	-0.32687	0.01802	0.395	0.003729
cg23378546	-0.32687	0.01802
cg27284883	-0.32678	0.01806
cg08460399	-0.32667	0.0181			GDAP1L1
cg01084566	-0.32667	0.01809			HPGD
cg24176760	-0.32666	0.0181			ART3
cg02401524	-0.32654	0.01815
cg26885493	-0.32652	0.01815	0.427	0.0016
cg24570371	-0.32644	0.01818	0.275	0.048857	LOC439933
cg13290417	-0.32641	0.01819			OGDH
cg04346477	-0.32639	0.0182			RAP1GAP
cg20844684	-0.32631	0.01823	0.464	0.000536
cg09296957	-0.32627	0.01825			ACY3
cg22125926	-0.32599	0.01835	0.373	0.00649	TNFRSF19
cg18677795	-0.32594	0.01837	0.43	0.001484
cg01093369	-0.32584	0.01841	-0.494	0.000199
cg22882310	-0.32579	0.01843	0.278	0.046348	NRXN3
cg11231563	-0.32567	0.01847	0.47	0.000445
cg10566776	-0.3256	0.0185			SNHG11
cg25138693	-0.32554	0.01852	0.334	0.015425
cg01876809	-0.32543	0.01857
cg12006118	-0.32541	0.01857
cg16496269	-0.32531	0.01861	0.405	0.002893
cg12014528	-0.32526	0.01863	-0.677	0	TMEM72-AS1
cg19585050	-0.32526	0.01863	-0.369	0.007126
cg09249173	-0.32525	0.01864	0.354	0.01012	TMEM51
cg06655439	-0.32519	0.01866
cg22714367	-0.32512	0.01869	0.532	4.9e-05
cg01778345	-0.32511	0.01869			GDAP2
cg03013968	-0.3251	0.01869	-0.301	0.029983
cg21858823	-0.32503	0.01872	0.438	0.001155	CASP9
cg27312603	-0.32503	0.01872			RDH8
cg10942914	-0.32498	0.01874
cg22780845	-0.32495	0.01875			TLL1
cg22862357	-0.32495	0.01875
cg09368597	-0.32486	0.01878	-0.682	0	ARSG
cg23666536	-0.32484	0.01879			PHTF1
cg01382567	-0.32482	0.0188			POC1B
cg17788374	-0.32479	0.01881
cg16888658	-0.32477	0.01882			ADCY3
cg18372467	-0.32473	0.01883	-0.483	0.000284
cg02680901	-0.3247	0.01885
cg02006950	-0.32467	0.01886
cg16859890	-0.32461	0.01888	-0.467	0.000489
cg12150799	-0.32455	0.0189
cg26687406	-0.32451	0.01892
cg08209110	-0.32437	0.01898	-0.328	0.017667
cg24387312	-0.32429	0.019	0.299	0.031161
cg22636562	-0.32412	0.01907
cg03183700	-0.32392	0.01915	-0.29	0.036737	ANK1
cg06731457	-0.32384	0.01918	0.438	0.001155	ADARB2
cg08291129	-0.32373	0.01922
cg02152945	-0.3236	0.01928			CNPY1
cg07156669	-0.32352	0.01931	0.294	0.034383	CPD
cg08849065	-0.3234	0.01936	0.518	8.5e-05	TRIM42
cg16906346	-0.3234	0.01935			KIAA0319
cg25274844	-0.32332	0.01939	0.302	0.029827	ADARB2
cg01488398	-0.32323	0.01942			SPTBN2
cg00601450	-0.32318	0.01944
cg09162749	-0.32316	0.01945			MICAL2
cg27454650	-0.32309	0.01948	0.283	0.041714	ANKS1A
cg26783428	-0.32305	0.01949			LOC100130557
cg01677628	-0.32288	0.01956
cg25960393	-0.32287	0.01957
cg10895682	-0.32286	0.01957
cg03085275	-0.32275	0.01961			METTL8
cg06770067	-0.32271	0.01963			MDGA1
cg22513428	-0.32267	0.01965	-0.463	0.000556	ATXN1
cg03283901	-0.32264	0.01966
cg07990680	-0.32262	0.01966	0.323	0.01961
cg12091645	-0.32255	0.01969			ROR1
cg14276478	-0.3225	0.01971			LOC100288798
cg21172454	-0.32244	0.01974	-0.301	0.030074	L3MBTL3
cg14059481	-0.32243	0.01974	0.617	1e-06
cg01798157	-0.3224	0.01975	0.536	4.2e-05	BTG2
cg23980177	-0.32239	0.01976	0.393	0.003996
cg16431836	-0.32234	0.01978
cg00257789	-0.3223	0.0198			TRAPPC12
cg06752040	-0.3222	0.01983			FAM107B
cg24433302	-0.32214	0.01986	-0.354	0.010042	AGPAT1
cg09886258	-0.32213	0.01986
cg14021373	-0.3221	0.01988			DAB2IP
cg26988210	-0.322	0.01992
cg06276061	-0.32194	0.01994	-0.377	0.00589
cg04843067	-0.3219	0.01996	0.311	0.024669	HOXD4
cg27399895	-0.32182	0.01999			GBP6
cg00204533	-0.3218	0.02			SARDH
cg00637745	-0.32175	0.02002
cg04683516	-0.32169	0.02004			AKR1C2
cg13928473	-0.3215	0.02012
cg18394120	-0.32144	0.02015
cg19712652	-0.32141	0.02016	0.354	0.009969
cg02017860	-0.3214	0.02016			SLC9C2
cg22430708	-0.32139	0.02017			MLLT3
cg19726599	-0.32112	0.02028			AFAP1
cg26091232	-0.32105	0.02031	0.491	0.000221
cg10076040	-0.32095	0.02035	0.344	0.012427	TMEM245
cg24864881	-0.32094	0.02035	-0.343	0.012681
cg09454628	-0.3209	0.02037
cg16596266	-0.3209	0.02037
cg00512484	-0.32084	0.02039
cg07096169	-0.32077	0.02042
cg25313855	-0.32063	0.02048			EFNA5
cg01872418	-0.32055	0.02051
cg14088784	-0.32054	0.02052	-0.375	0.006088
cg03604842	-0.32041	0.02057			ELOVL5
cg11438552	-0.3203	0.02062			PRODH
cg04847825	-0.32026	0.02063	0.455	0.000699
cg12025562	-0.32026	0.02063			ZKSCAN2
cg20916523	-0.32017	0.02067			VHL
cg22157099	-0.32017	0.02067
cg24028694	-0.32008	0.02071
cg02283204	-0.32007	0.02072	0.398	0.003473
cg05389555	-0.32005	0.02072			KLHL21
cg22181382	-0.31998	0.02075
cg22043634	-0.31992	0.02078	0.548	2.7e-05	MAPK15
cg12560103	-0.31989	0.02079
cg26126295	-0.31988	0.02079	0.289	0.037377	NDST3
cg07811112	-0.31988	0.02079
cg15044010	-0.31987	0.0208			SRPK2
cg07364162	-0.31977	0.02084	-0.299	0.03126	PRDM16
[truncated: 18,749 more rows]
